# Supplementary material for: Integrated proteogenomic approach identifying a protein signature of COPD and a new splice variant of SORBS1
Source: PubMed Central journal article supplement (PMC7029225; doi:10.1136/thoraxjnl-2019-213200), 2020-01-14
Supplement: thoraxjnl-2019-213200supp002.pdf [file thoraxjnl-2019-213200supp002.pdf]

| <b>Column name</b>                 | <b>description</b>                                                                                                |
|------------------------------------|-------------------------------------------------------------------------------------------------------------------|
| <i>SpectraFile</i>                 | path and file name of mzML file containing the assessed peptide spectra                                           |
| <i>ScanNum</i>                     | scan number of assessed spectra                                                                                   |
| <i>Peptide</i>                     | sequence of assessed peptide with PTM                                                                             |
| <i>sub_pos</i>                     | position of the altered amino acid                                                                                |
| <i>status</i>                      | status indicating if the spectra was evaluated (checked) or not (skipped) by SpectrumAI                           |
| <i>Sequence</i>                    | sequence of assessed peptide without PTM                                                                          |
| <i>peptide_length</i>              | length of the assessed peptide                                                                                    |
| <i>ions_support</i>                | boolean indicator for presence (YES) or absence (NO) of ion fragments containing the altered amino acid           |
| <i>support_ions</i>                | list ion fragments containing the altered amino acid                                                              |
| <i>sum.supportions.intensity</i>   | sum of the intensity of the ion fragments containing the altered amino acid                                       |
| <i>flanking_ions_support</i>       | boolean indicator for presence (YES) or absence (NO) of flanking ion fragments neighboring the altered amino acid |
| <i>flanking_ions</i>               | list of flanking ion fragments neighboring the altered amino acid                                                 |
| <i>sum.flanking.ions.intensity</i> | sum of the intensity of the flanking ion fragments neighboring the altered amino acid                             |
| <i>matched_ions</i>                | list of fragment ions matched in the MS/MS spectra                                                                |
| <i>sum.matchedions.intensity</i>   | sum of the intensity of all fragment ions matched in the MS/MS spectra                                            |
| <i>sum.fragmentions.intensity</i>  | sum of the intensity of all fragment ions in the MS/MS spectra                                                    |
| <i>maxintensity</i>                | maximal fragment ion intensity                                                                                    |
| <i>average_intensity</i>           | average fragment ion intensity in the MS/MS spectra                                                               |
| <i>median_intensity</i>            | medium fragment ion intensity in the MS/MS spectra                                                                |

| Spectrafile                                                  | ScanNum | Peptide                                            | sub_pos | status  | Sequence                                           | peptide_length | ions_support | support_ions                                       | sum.supportions.intensity | flanking_ions_support | flanking_ions   | sum.flanking_ions.intensity                                                                 | matched_ions                                                                                                       | sum.matchedions.intensity | sum.fragmentsions.intensity | maintintensity | average_intensity | median_intensity |
|--------------------------------------------------------------|---------|----------------------------------------------------|---------|---------|----------------------------------------------------|----------------|--------------|----------------------------------------------------|---------------------------|-----------------------|-----------------|---------------------------------------------------------------------------------------------|--------------------------------------------------------------------------------------------------------------------|---------------------------|-----------------------------|----------------|-------------------|------------------|
| e:\data\MSData\2015\CPD_25cm_10\mzML\150111_3_01.mzML        | 26144   | ISYGPWKFVYVLEAFEGTEPK                              | 12      | checked | ISYGPWKFVYVLEAFEGTEPK                              | 25             | YES          | b12,y14                                            | 9160.64638                | YES                   | b11,y14,b12,y13 | 27971.74451                                                                                 | b2,b4,b6,b7,b8,b9,b10,b11,b12,y2,y3,y4,y5,y6,y7,y8,y9,y10,y12,y13,y14                                              | 20528.75598               | 3420939.20965               | 44857.75000    | 641.58650         | 0                |
| e:\data\MSData\2015\CPD_25cm_10\mzML\150110_2_01.mzML        | 12943   | QILEKELNTRAGELR                                    | 8       | checked | QILEKELNTRAGELR                                    | 15             | YES          | b9,y8,y10,y11                                      | 28320.30593               | YES                   | b7,y8,y7        | 32088.97012                                                                                 | b1,b2,b4,b5,b6,b7,b9,y1,y2,y3,y4,y5,y6,y7,y8,y9,y10,y11                                                            | 34948.78052               | 8617742.11253               | 128488.08032   | 1131.58879        | 0                |
| e:\data\MSData\2015\CPD_25cm_20\mzML\150130_3_100mM_01.mzML  | 12086   | ASDQSDNTAWVQDQPGAGPR                               | 8       | checked | ASDQSDNTAWVQDQPGAGPR                               | 22             | YES          | b8,b9,b11                                          | 2309.28577                | YES                   | b7,b9           | 2041.15613                                                                                  | b3,b4,b5,b6,b7,b8,b9,b11,y1,y2,y3,y4,y5,y6,y7,y8,y9,y10,y11,y13                                                    | 6248989.69294             | 1448089.19333               | 262398.15625   | 1563.38619        | 0                |
| e:\data\MSData\2015\CPD_25cm_10\mzML\150120_3_01.mzML        | 27083   | GGGAGFSGLTLELDNPGAKR                               | 11      | checked | GGGAGFSGLTLELDNPGAKR                               | 22             | YES          | b11,y12,y13,y14,y15,y16                            | 52893.24579               | YES                   | y12,b11,y11     | 27326.19159                                                                                 | b3,b4,b5,b6,b7,b8,b9,b11,y2,y3,y4,y5,y6,y7,y8,y9,y10,y11,y12,y13,y14,y15,y16                                       | 251771.72107              | 44207.86719                 | 705.15244      | 0                 |                  |
| e:\data\MSData\2015\CPD_25cm_10\mzML\150125_2_01.mzML        | 18493   | LWFWASAR                                           | 8       | checked | LWFWASAR                                           | 9              | YES          | y2,y3,y4,y5,y6,y7,y8                               | 87201.62782               | YES                   | y2,y1           | 15339.23976                                                                                 | b1,b2,b3,y1,y2,y3,y4,y5,y6,y7,y8                                                                                   | 130027.42441              | 2292307.61383               | 132206.68750   | 900.03747         | 0                |
| e:\data\MSData\2015\CPD_25cm_20\mzML\150414_10_500mM_01.mzML | 2122    | LHS2TKAESEK                                        | 2       | checked | LHS2TKAESEK                                        | 13             | YES          | b2,b3,b4,b5,b6,y7                                  | 44605.26441               | NO                    | b2,y1           | 34686.19322                                                                                 | b2,b3,b4,b5,b6,y1,y2,y3,y4,y5,y6,y7,y8,y9,y11                                                                      | 416509.70218              | 2444440.46447               | 45286.42578    | 635.24949         | 0                |
| e:\data\MSData\2015\CPD_25cm_10\mzML\150225_8_01.mzML        | 7532    | LLEDLR                                             | 0       | skipped | LLEDLR                                             | 6              | NO           |                                                    | 0                         | NO                    |                 | b1,b2,b4,y1,y2,y3,y4,y5                                                                     | 174611.05951                                                                                                       | 15437027.13767            | 2193327.50000               | 3020.35945     | 0                 |                  |
| e:\data\MSData\2015\CPD_50cm_10\mzML\150210_2_01.mzML        | 22081   | NSLFLQMNLSR                                        | 4       | checked | NSLFLQMNLSR                                        | 11             | YES          | b4,b5,b7,y8,y9,y10                                 | 191427.00000              | YES                   | b3,y8,b4,y7     | 427611.61328                                                                                | b1,b2,b3,b4,b5,b7,y1,y2,y3,y4,y5,y6,y7,y8,y9,y10                                                                   | 881795.59814              | 1692326.47102               | 156364.82813   | 1445.72963        | 0                |
| e:\data\MSData\2015\CPD_25cm_20\mzML\150130_3_20mM_01.mzML   | 12448   | ISNSAATGSDSHVANSALGOTPQQDQTLVQR                    | 6       | checked | ISNSAATGSDSHVANSALGOTPQQDQTLVQR                    | 32             | YES          | b6,b7,b8,b9,b10,b11,b12                            | 22504.91760               | YES                   | b5,b6           | 8842.66626                                                                                  | b3,b4,b5,b6,b7,b8,b9,b10,b11,b12,y2,y3,y4,y5,y6,y7,y8,y9,y10,y11,y12,y13,y14,y15,y16,y17,y20                       | 317084.30737              | 5276909.3392                | 134664.82813   | 934.21551         | 0                |
| e:\data\MSData\2015\CPD_25cm_10\mzML\150126_12_30mM_01.mzML  | 4714    | NVSNPC+57.02NHEAVGK                                | 14      | NO      |                                                    | 14             | NO           |                                                    | 0                         | NO                    |                 | b1,b2,b3,b5,y1,y2,y3,y4,y5,y6,y7,y8,y9,y10                                                  | 231482.83154                                                                                                       | 1082907.05520             | 138082.71875                | 921.46078      | 0                 |                  |
| e:\data\MSData\2015\CPD_25cm_20\mzML\150126_15_40mM_01.mzML  | 7488    | ADSDQAGATEKEGDPQASAGDETPITSK                       | 16      | checked | ADSDQAGATEKEGDPQASAGDETPITSK                       | 31             | YES          | b18,y16,y18,y19                                    | 10019.61511               | YES                   | y16,y15         | 42817.76611                                                                                 | b3,b4,b5,b6,b7,b8,b9,b10,b11,b12,b13,b14,b15,y4,y5,y6,y7,y8,y9,y10,y11,y12,y13,y14,y15,y16,y18,y19                 | 524910.01887              | 762126.72509                | 91217.79688    | 1087.40658        | 0                |
| e:\data\MSData\2015\CPD_25cm_20\mzML\150126_14_50mM_01.mzML  | 2846    | EAGDSASASAPGVK                                     | 13      | checked | EAGDSASASAPGVK                                     | 16             | YES          | y5,y7,y8,y9,y10,y11,y2,y14                         | 56476.63392               | YES                   | y8              | 4414.00035                                                                                  | b2,b3,b4,b5,b6,b7,y8,y9,y10,y11,y2,y14                                                                             | 687960.80709              | 20718.52344                 | 473.44607      | 0                 |                  |
| e:\data\MSData\2015\CPD_25cm_10\mzML\150118_11_40mM_01.mzML  | 3487    | EQGNQSTSLQNR                                       | 6       | checked | EQGNQSTSLQNR                                       | 13             | YES          | y8,y9,y10,y11                                      | 19230.81787               | YES                   | y8,y7           | 15179.80518                                                                                 | b2,b3,y1,y2,y3,y4,y5,y6,y7,y8,y9,y10,y11                                                                           | 53623.61555               | 555884.54841                | 11339.18457    | 424.63296         | 0                |
| e:\data\MSData\2015\CPD_25cm_20\mzML\150505_20_100mM_01.mzML | 15911   | YGFQFLR                                            | 5       | checked | YGFQFLR                                            | 7              | YES          | y3,y4,y5,y6                                        | 342169.82031              | YES                   | b4,y3,y2        | 76357.45380                                                                                 | b1,b2,b3,b4,y1,y2,y3,y4,y5,y6                                                                                      | 7655160.30710             | 356793.96875                | 1724.91219     | 0                 |                  |
| e:\data\MSData\2015\CPD_50cm_10\mzML\150210_13_01.mzML       | 29106   | TGIEALISQITWAPPQDTSEYSHQVPTGDEPLQRF                | 0       | skipped | TGIEALISQITWAPPQDTSEYSHQVPTGDEPLQRF                | 39             | NO           |                                                    | 0                         | NO                    |                 | b4,b5,b6,b7,b8,b9,b10,b11,b12,b14,b15,y2,y3,y4,y5,y6,y7,y8,y9,y10,y11,y13,y15,y16,y17,y20   | 117926.96419                                                                                                       | 3000931.78626             | 40984.57813                 | 653.49352      | 0                 |                  |
| e:\data\MSData\2015\CPD_25cm_20\mzML\150126_14_50mM_01.mzML  | 2347    | AEDM+15.9RETNVAVPGSDQTR                            | 13      | checked | AEDM+15.9RETNVAVPGSDQTR                            | 18             | YES          | y5,y7,y8,y9,y10                                    | 99088.17163               | YES                   | y6,y5           | 26260.49211                                                                                 | b2,b3,b4,b5,b6,y1,b8,b9,b10,y1,y2,y3,y4,y5,y6,y7,y8,y9,y10                                                         | 323276.67716              | 521338.42703                | 53138.42703    | 689.96225         | 0                |
| e:\data\MSData\2015\CPD_25cm_20\mzML\150424_16_40mM_01.mzML  | 3828    | YEDENR                                             | 7       | checked | YEDENR                                             | 7              | YES          | y1,y2,y3,y4,y5,y6                                  | 279658.42703              | YES                   | y1              | 38967.22656                                                                                 | b1,b2,b3,y1,y2,y3,y4,y5,y6                                                                                         | 7453859.75510             | 305118.43750                | 1651.64187     | 0                 |                  |
| e:\data\MSData\2015\CPD_25cm_20\mzML\150424_16_40mM_01.mzML  | 6014    | SDSELNNEVAR                                        | 7       | checked | SDSELNNEVAR                                        | 12             | YES          | y6,y7,y8,y9,y10                                    | 261580.79785              | YES                   | y6,y5           | 72925.87109                                                                                 | b2,b3,b4,b5,y1,y2,y3,y4,y5,y6,y7,y8,y9,y10                                                                         | 512029.38883              | 635364.38970                | 113427.41406   | 1046.62921        | 0                |
| e:\data\MSData\2015\CPD_25cm_20\mzML\150505_20_100mM_01.mzML | 3769    | EPOGSAVEK                                          | 1       | checked | EPOGSAVEK                                          | 10             | YES          | b2                                                 | 1664.32340                | YES                   | y9              | 472.85000                                                                                   | b2,y1,y2,y3,y4,y5,y6,y7,y8,y9                                                                                      | 1522960.38195             | 600203.94922                | 901.10016      | 0                 |                  |
| e:\data\MSData\2015\CPD_25cm_20\mzML\150126_14_50mM_01.mzML  | 4065    | NKYEENR                                            | 9       | checked | NKYEENR                                            | 9              | YES          | y1,y2,y3,y4,y5,y6,y7                               | 405269.73071              | YES                   | y1              | 121365.79688                                                                                | b1,b2,b3,b4,b5,b6,y1,y2,y3,y4,y5,y6,y7                                                                             | 464514.63150              | 18032757.23679              | 352745.93750   | 1446.78733        | 56.37574         |
| e:\data\MSData\2015\CPD_25cm_20\mzML\150126_14_50mM_01.mzML  | 10086   | DPAGETPEAAGTR                                      | 0       | skipped | DPAGETPEAAGTR                                      | 14             | NO           |                                                    | 0                         | NO                    |                 | b2,b3,b4,b5,b6,y1,y2,y3,y4,y5,y6,y7,y8,y9,y10,y11,y12                                       | 192525.93436                                                                                                       | 1658047.21516             | 49731.89453                 | 591.10418      | 0                 |                  |
| e:\data\MSData\2015\CPD_25cm_20\mzML\150118_11_40mM_01.mzML  | 9167    | EEDQPSAQDETPITSK                                   | 4       | checked | EEDQPSAQDETPITSK                                   | 19             | YES          | b4,b5,b7,b8                                        | 7809.23681                | YES                   | b3,b4           | 2580.99384                                                                                  | b2,b3,b4,b6,b7,b8,y1,y2,y3,y4,y5,y6,y7,y8,y9,y10,y11,y12,y13                                                       | 94508.21205               | 1414200.21248               | 18506.37655    | 523.19805         | 0                |
| e:\data\MSData\2015\CPD_25cm_20\mzML\150129_17_20mM_01.mzML  | 13173   | TLEGLQVEEPPYK                                      | 14      | checked | TLEGLQVEEPPYK                                      | 14             | YES          | y1,y2,y3,y4,y5,y6,y7,y8,y9,y10,y11                 | 187544.99377              | YES                   | y1              | 8358.89648                                                                                  | b2,b3,b4,b5,b7,y1,y2,y3,y4,y5,y6,y7,y8,y9,y10,y11                                                                  | 241436.69220              | 3465533.20655               | 147233.62500   | 788.33785         | 0                |
| e:\data\MSData\2015\CPD_25cm_10\mzML\150111_19_03.mzML       | 2397    | DSRPSQAAGDNGDEVK                                   | 16      | checked | DSRPSQAAGDNGDEVK                                   | 17             | YES          | y2,y3,y4,y5,y6,y7,y8,y9,y10,y11                    | 60030.32959               | YES                   | y2,y1           | 15181.24219                                                                                 | b2,b3,b5,b6,b7,b8,b9,b10,b11,y1,y2,y3,y4,y5,y6,y7,y8,y9,y10,y11                                                    | 136721.72188              | 1638891.56872               | 2853.12704     | 632.82005         | 0                |
| e:\data\MSData\2015\CPD_25cm_20\mzML\150111_15_01.mzML       | 17573   | ELTVSNDNEGWHVHC+57.02SDGLK                         | 15      | checked | ELTVSNDNEGWHVHC+57.02SDGLK                         | 22             | YES          | b16,y8,y9,y10,y11,y12,y13,y15,y16                  | 45804.04848               | YES                   | y8,y7           | 81787.25255                                                                                 | b2,b3,b4,b5,b6,b8,b9,b10,y2,y3,y4,y5,y6,y7,y8,y9,y10,y11,y12,y13,y15,y16                                           | 1664961.47159             | 178899.65625                | 1563.09215     | 0                 |                  |
| e:\data\MSData\2015\CPD_25cm_10\mzML\150111_19_03.mzML       | 29732   | EQAQCEAMQDELEELR                                   | 18      | checked | EQAQCEAMQDELEELR                                   | 18             | YES          | y6,y7,y8,y9,y10,y11                                | 42449.44088               | YES                   | y6,y5           | 19153.50195                                                                                 | b2,b3,b4,b5,b6,b7,b8,b9,b10,y1,y2,y3,y4,y5,y6,y7,y8,y9,y10,y11                                                     | 100668.58357              | 1022796.82420               | 18225.70070    | 489.64003         | 0                |
| e:\data\MSData\2015\CPD_25cm_20\mzML\150130_3_100mM_01.mzML  | 15436   | GATNIVEALKDQR                                      | 6       | checked | GATNIVEALKDQR                                      | 16             | YES          | b6,b7,y11,y12,y13                                  | 29664.60868               | YES                   | b5,y11,b6,y10   | 63380.91233                                                                                 | b5,y11,b6,y10                                                                                                      | 21245.80850               | 1917098.69502               | 41826.80959    | 807.87977         | 0                |
| e:\data\MSData\2015\CPD_25cm_20\mzML\150130_3_100mM_01.mzML  | 12809   | SDHC+17.02EDTFAGYFAVAIVK                           | 15      | checked | SDHC+17.02EDTFAGYFAVAIVK                           | 20             | YES          | y6,y7,y8,y9,y10,y11                                | 393209.42125              | YES                   | y6,y5           | 86237.01563                                                                                 | b2,b3,b4,b5,b6,b7,b9,b10,b12,y2,y3,y4,y5,y6,y7,y8,y9,y10,y11,y12,y13,y15                                           | 618460.50086              | 1123760.52917               | 162286.06250   | 1377.53972        | 0                |
| e:\data\MSData\2015\CPD_25cm_10\mzML\150111_19_03.mzML       | 26054   | VNDVYKDEKSLGLQWPGFEEMK                             | 1       | checked | VNDVYKDEKSLGLQWPGFEEMK                             | 25             | YES          | b2,b3,b4,b5,b6,b7,b9,b10,b11,b12,b13               | 69621.99310               | NO                    |                 | 0                                                                                           | b2,b3,b4,b5,b6,b7,b9,b10,b11,b12,b13,y1,y2,y3,y4,y5,y6,y7,y8,y9,y10,y11,y12,y13,y15,y16                            | 3002284.90726             | 60018.42609                 | 600.72949      | 0                 |                  |
| e:\data\MSData\2015\CPD_25cm_10\mzML\150111_19_03.mzML       | 28282   | AVQSDVLLMKPDAELSSAVYLNPEKDTLPGFLNQDDQDDCNR         | 47      | checked | AVQSDVLLMKPDAELSSAVYLNPEKDTLPGFLNQDDQDDCNR         | 47             | YES          | y7,y8,y9,y10,y11,y12,y13,y14,y16,y18,y19,y22       | 326729.76444              | YES                   | y7,y6           | 88446.26953                                                                                 | b4,b5,b6,b7,b8,b9,b10,b11,b12,b13,b14,b15,b17,b18,b19,b22,y3,y4,y5,y6,y7,y8,y9,y10,y11,y12,y13,y14,y16,y18,y19,y22 | 18003983.37546            | 164286.06250                | 1687.82070     | 0                 |                  |
| e:\data\MSData\2015\CPD_25cm_20\mzML\150130_3_100mM_01.mzML  | 3190    | DSEDEVSRDSKEMATK                                   | 17      | checked | DSEDEVSRDSKEMATK                                   | 17             | YES          | b8,b9,b10,b11,b12,b13,y12                          | 21001.29926               | YES                   |                 | 0                                                                                           | b2,b3,b4,b5,b6,b7,b8,b9,b10,b11,b12,b13,y1,y2,y3,y4,y5,y6,y7,y8,y9,y12                                             | 5909549.83078             | 69878.35156                 | 713.92929      | 0                 |                  |
| e:\data\MSData\2015\CPD_25cm_20\mzML\150130_3_100mM_01.mzML  | 12235   | EVQLVGGSGVQPGSGLSR                                 | 11      | checked | EVQLVGGSGVQPGSGLSR                                 | 19             | YES          | b11,b12,b13,b16,y8,y10,y11,y12,y13,y14,y15,y16,y17 | 454201.63881              | YES                   | b10,y9,b11,y8   | 62220.49365                                                                                 | b1,b2,b3,b4,b5,b6,b7,b9,b10,b11,b12,b13,b16,y1,y2,y3,y4,y5,y6,y7,y8,y9,y10,y11,y12,y13,y14,y15,y16,y17             | 886991.18837              | 134026.39063                | 1553.21558     | 0                 |                  |
| e:\data\MSData\2015\CPD_25cm_20\mzML\150422_12_100mM_01.mzML | 5632    | SPYASDHTLSR                                        | 13      | checked | SPYASDHTLSR                                        | 13             | YES          | y8,y9,y10                                          | 39873.87180               | YES                   | b5,y8,y7        | 48020.08398                                                                                 | b1,b2,b3,y1,y2,y3,y4,y5,y6,y7,y8,y9,y10                                                                            | 375826.32524              | 12680947.51900              | 30627.43500    | 1314.25020        | 0                |
| e:\data\MSData\2015\CPD_50cm_10\mzML\150210_2_01.mzML        | 21220   | ADIDVSGPVQVDPVPPVNEGPDAK                           | 0       | skipped | ADIDVSGPVQVDPVPPVNEGPDAK                           | 25             | NO           |                                                    | 0                         | NO                    |                 | b2,b3,b4,b5,b6,b7,b8,b9,b10,b11,b12,b13,b14,y2,y3,y4,y5,y6,y7,y8,y9,y10,y11,y12,y13,y14,y15 | 1739910.97515                                                                                                      | 2566746.18843             | 287588.78125                | 2390.56610     | 2.17051           |                  |
| e:\data\MSData\2015\CPD_25cm_20\mzML\150422_8_500mM_01.mzML  | 14520   | SAVGGPQRDLG+57.02DQV+57.02YVSSVSLVPC+57.02AFYWNHVK | 8       | checked | SAVGGPQRDLG+57.02DQV+57.02YVSSVSLVPC+57.02AFYWNHVK | 32             | YES          | b9,b10,b11,b13,b14,b15,b18,b19                     | 161269.00684              | YES                   |                 | 0                                                                                           | b3,b4,b5,b6,b7,b8,b9,b10,b11,b13,b14,b15,b18,b19,y3,y4,y5,y6,y7,y8,y9,y10,y11,y12,y13,y14,y15                      | 10955570.08448            | 21228755.74678              | 406509.15625   | 1774.89988        | 0                |
| e:\data\MSData\2015\CPD_25cm_10\mzML\150111_19_03.mzML       | 11218   | MA+15.9HKSMPFEVK                                   | 0       | skipped | MHKSMPFEVK                                         | 11             | NO           |                                                    | 0                         | NO                    |                 | b7,b8,y1,y2,y3,y4,y5,y6,y7                                                                  | 769877.96606                                                                                                       | 36542534.32770            | 460765.21200                | 2880.95651     | 69.90292          |                  |
| e:\data\MSData\2015\CPD_25cm_10\mzML\150111_9_03.mzML        | 26504   | SVFKPIFGVGVADAPQVLSPTFGAQPDR                       | 10      | checked | SVFKPIFGVGVADAPQVLSPTFGAQPDR                       | 30             | YES          | b10,b11,b12,b13,b14                                | 15717.94775               | YES                   | b9,b10          | 28326.42822                                                                                 | b3,b4,b5,b6,b7,b8,b9,b10,b11,b12,b13,b14,y3,y4,y5,y6,y7,y8,y9,y10,y11,y12,y13                                      | 288342.45166              | 4370130.28712               | 59883.81641    | 938.40032         | 0                |
| e:\data\MSData\2015\CPD_25cm_10\mzML\150120_10_01.mzML       | 22140   | AAGAGQDQDC+57.02EYLMVGVGVC+57.02DQGVPR             | 24      | checked | AAGAGQDQDC+57.02EYLMVGVGVC+57.02DQGVPR             | 24             | YES          | y2,y3,y4,y5,y6,y7,y8,y9,y10,y11,y12,y13            | 20043.62398               | NO                    |                 | 0                                                                                           | b3,b4,b5,b6,b7,b8,b9,b10,b11,b12,y2,y3,y4,y5,y6,y7,y8,y9,y10,y11,y12,y13                                           | 3899114.88949             | 97193.56250                 | 901.32106      | 0                 |                  |
| e:\data\MSData\2015\CPD_25cm_10\mzML\150103_8_03.mzML        | 13217   | LWDSKTR                                            | 8       | checked | LWDSKTR                                            | 9              | YES          | y4,y5,y6,y7,y8                                     | 180702.33984              | YES                   | y2,y1           | 156386.56641                                                                                | b1,b2,b3,y1,y2,y3,y4,y5,y6,y7,y8                                                                                   | 4021652.25304             | 2                           |                |                   |                  |
