# Supplementary material for: Integrated proteogenomic approach identifying a protein signature of COPD and a new splice variant of SORBS1
Source: PubMed Central journal article supplement (PMC7029225; doi:10.1136/thoraxjnl-2019-213200), 2020-01-14
Supplement: thoraxjnl-2019-213200supp003.pdf [file thoraxjnl-2019-213200supp003.pdf]

## List of differential proteins and transcript

| sheets                         | Description                                                       |
|--------------------------------|-------------------------------------------------------------------|
| DE proteins comb FDR 0.05 up   | Differential proteins, which increased and has FDR p-value < 0.05 |
| DE proteins comb FDR 0.05 down | Differential proteins, which decreased and has FDR p-value < 0.05 |
| DE mRNA comb FDR 0.05 up       | Differential mRNA which increased and has FDR p-value < 0.05      |
| DE mRNA comb FDR 0.05 down     | Differential mRNA, which decreased and has FDR p-value < 0.05     |

DE proteins comb FDR 0.05 up

| Ensembl gene    | logFC   | logCPM   | LR       | PValue   | adj.p    | gene          | geneDescription                                                                                   |
|-----------------|---------|----------|----------|----------|----------|---------------|---------------------------------------------------------------------------------------------------|
| ENSG00000128595 | 1.19317 | 9.40518  | 58.38251 | 2.16E-14 | 3.72E-11 | CALU          | calumenin [Source:HGNC Symbol;Acc:HGNC:1458]                                                      |
| ENSG00000173267 | 1.89795 | 8.30998  | 43.90399 | 3.45E-11 | 1.14E-08 | SNCG          | synuclein gamma [Source:HGNC Symbol;Acc:HGNC:11141]                                               |
| ENSG00000149428 | 0.98218 | 9.92682  | 43.63452 | 3.96E-11 | 1.14E-08 | HYOU1         | hypoxia up-regulated 1 [Source:HGNC Symbol;Acc:HGNC:16931]                                        |
| ENSG00000162735 | 3.60491 | 7.03458  | 42.27054 | 7.95E-11 | 1.96E-08 | PEX19         | peroxisomal biogenesis factor 19 [Source:HGNC Symbol;Acc:HGNC:9713]                               |
| ENSG00000127022 | 1.87779 | 8.75570  | 39.30611 | 3.62E-10 | 6.94E-08 | CANX          | calnexin [Source:HGNC Symbol;Acc:HGNC:1473]                                                       |
| ENSG00000163431 | 3.30390 | 7.38293  | 36.48381 | 1.54E-09 | 2.41E-07 | LMOD1         | leiomodulin 1 [Source:HGNC Symbol;Acc:HGNC:6647]                                                  |
| ENSG00000143420 | 2.39618 | 7.32907  | 35.70016 | 2.30E-09 | 3.11E-07 | ENSA          | endosulfine alpha [Source:HGNC Symbol;Acc:HGNC:3360]                                              |
| ENSG00000047779 | 1.81747 | 7.98959  | 33.61459 | 6.72E-09 | 7.72E-07 | NDUFAB1       | NADH:ubiquinone oxidoreductase subunit AB1 [Source:HGNC Symbol;Acc:HGNC:7694]                     |
| ENSG00000099942 | 1.18977 | 8.52265  | 33.38503 | 7.56E-09 | 8.15E-07 | CRKL          | CRK like proto-oncogene, adaptor protein [Source:HGNC Symbol;Acc:HGNC:2363]                       |
| ENSG0000005194  | 2.24576 | 7.20748  | 30.37993 | 3.55E-08 | 3.06E-06 | CIAPIN1       | cytokine induced apoptosis inhibitor 1 [Source:HGNC Symbol;Acc:HGNC:28050]                        |
| ENSG00000138385 | 0.67268 | 9.66788  | 30.13051 | 4.04E-08 | 3.18E-06 | SSB           | Sjogren syndrome antigen B [Source:HGNC Symbol;Acc:HGNC:11316]                                    |
| ENSG00000115677 | 0.97378 | 8.90102  | 29.85969 | 4.64E-08 | 3.37E-06 | HDLBP         | high density lipoprotein binding protein [Source:HGNC Symbol;Acc:HGNC:4857]                       |
| ENSG00000070081 | 1.16560 | 8.75927  | 28.85410 | 7.80E-08 | 4.98E-06 | NUCB2         | nucleobindin 2 [Source:HGNC Symbol;Acc:HGNC:8044]                                                 |
| ENSG00000054116 | 3.40844 | 6.59476  | 27.31377 | 1.73E-07 | 9.94E-06 | TRAPPC3       | trafficking protein particle complex 3 [Source:HGNC Symbol;Acc:HGNC:19942]                        |
| ENSG00000100650 | 2.89551 | 6.97919  | 25.46220 | 4.51E-07 | 2.43E-05 | SRSF5         | serine and arginine rich splicing factor 5 [Source:HGNC Symbol;Acc:HGNC:10787]                    |
| ENSG00000151150 | 2.71985 | 7.03398  | 25.39562 | 4.67E-07 | 2.44E-05 | ANK3          | ankyrin 3 [Source:HGNC Symbol;Acc:HGNC:494]                                                       |
| ENSG00000205581 | 2.27577 | 7.23870  | 25.20710 | 5.15E-07 | 2.61E-05 | HMG1          | high mobility group nucleosome binding domain 1 [Source:HGNC Symbol;Acc:HGNC:4984]                |
| ENSG00000187908 | 3.52544 | 7.93586  | 25.11755 | 5.39E-07 | 2.66E-05 | DMBT1         | deleted in malignant brain tumors 1 [Source:HGNC Symbol;Acc:HGNC:2926]                            |
| ENSG00000131016 | 0.54773 | 10.96913 | 24.75191 | 6.52E-07 | 3.12E-05 | AKAP12        | A-kinase anchoring protein 12 [Source:HGNC Symbol;Acc:HGNC:370]                                   |
| ENSG00000117983 | 6.03579 | 9.09665  | 24.21007 | 8.64E-07 | 3.92E-05 | MUC5B         | mucin 5B, oligomeric mucus/gel-forming [Source:HGNC Symbol;Acc:HGNC:7516]                         |
| ENSG00000116455 | 3.27039 | 6.74275  | 23.44734 | 1.28E-06 | 5.68E-05 | WDR77         | WD repeat domain 77 [Source:HGNC Symbol;Acc:HGNC:29652]                                           |
| ENSG00000101443 | 3.52974 | 7.12534  | 23.22345 | 1.44E-06 | 6.22E-05 | WFDC2         | WAP four-disulfide core domain 2 [Source:HGNC Symbol;Acc:HGNC:15939]                              |
| ENSG00000163754 | 1.23158 | 8.03692  | 22.89768 | 1.71E-06 | 7.05E-05 | GYG1          | glycogenin 1 [Source:HGNC Symbol;Acc:HGNC:4699]                                                   |
| ENSG00000164879 | 1.05705 | 9.46880  | 22.88752 | 1.72E-06 | 7.05E-05 | CA3           | carbonic anhydrase 3 [Source:HGNC Symbol;Acc:HGNC:1374]                                           |
| ENSG00000125977 | 1.24397 | 8.02257  | 22.65407 | 1.94E-06 | 7.60E-05 | EIF2S2        | eukaryotic translation initiation factor 2 subunit beta [Source:HGNC Symbol;Acc:HGNC:3266]        |
| ENSG00000198157 | 2.54469 | 6.91097  | 22.15908 | 2.51E-06 | 9.01E-05 | HMG5          | high mobility group nucleosome binding domain 5 [Source:HGNC Symbol;Acc:HGNC:8013]                |
| ENSG00000076554 | 2.23612 | 7.04991  | 21.25055 | 4.03E-06 | 0.000134 | TPD52         | tumor protein D52 [Source:HGNC Symbol;Acc:HGNC:12005]                                             |
| ENSG00000130811 | 1.12696 | 8.17608  | 20.50046 | 5.96E-06 | 0.000180 | EIF3G         | eukaryotic translation initiation factor 3 subunit G [Source:HGNC Symbol;Acc:HGNC:3274]           |
| ENSG00000090273 | 0.98190 | 8.53567  | 20.52810 | 5.88E-06 | 0.000180 | NUDC          | nuclear distribution C, dynein complex regulator [Source:HGNC Symbol;Acc:HGNC:8045]               |
| ENSG00000078140 | 2.04346 | 7.11456  | 20.08800 | 7.40E-06 | 0.000216 | UBE2K         | ubiquitin conjugating enzyme E2 K [Source:HGNC Symbol;Acc:HGNC:4914]                              |
| ENSG00000166503 | 1.33234 | 7.91794  | 19.91935 | 8.08E-06 | 0.000232 | RP11-382A20.3 | Hepatoma-derived growth factor-related protein 3 [Source:UniProtKB/Swiss-Prot;Acc:Q9Y3E1]         |
| ENSG00000187239 | 2.06160 | 6.95761  | 19.31237 | 1.11E-05 | 0.000304 | FNBP1         | formin binding protein 1 [Source:HGNC Symbol;Acc:HGNC:17069]                                      |
| ENSG00000051620 | 0.75965 | 8.81799  | 19.05229 | 1.27E-05 | 0.000327 | HEBP2         | heme binding protein 2 [Source:HGNC Symbol;Acc:HGNC:15716]                                        |
| ENSG00000104131 | 1.27930 | 7.74392  | 18.98338 | 1.32E-05 | 0.000334 | EIF3J         | eukaryotic translation initiation factor 3 subunit J [Source:HGNC Symbol;Acc:HGNC:3270]           |
| ENSG00000126878 | 1.61936 | 7.27324  | 18.85871 | 1.41E-05 | 0.000352 | AIF1L         | allograft inflammatory factor 1 like [Source:HGNC Symbol;Acc:HGNC:28904]                          |
| ENSG00000170606 | 0.69524 | 9.73380  | 18.43806 | 1.76E-05 | 0.000415 | HSPA4         | heat shock protein family A (Hsp70) member 4 [Source:HGNC Symbol;Acc:HGNC:5237]                   |
| ENSG00000155660 | 0.43765 | 10.71761 | 18.44511 | 1.75E-05 | 0.000415 | PDIA4         | protein disulfide isomerase family A member 4 [Source:HGNC Symbol;Acc:HGNC:30167]                 |
| ENSG00000163636 | 1.13237 | 7.96507  | 17.71441 | 2.57E-05 | 0.000575 | PSMD6         | proteasome 26S subunit, non-ATPase 6 [Source:HGNC Symbol;Acc:HGNC:9564]                           |
| ENSG00000165416 | 1.07752 | 7.97071  | 17.36732 | 3.08E-05 | 0.000656 | SUGT1         | SGT1 homolog, M1512 kinetochore complex assembly co-chaperone [Source:HGNC Symbol;Acc:HGNC:16987] |
| ENSG00000159140 | 2.49785 | 6.91185  | 17.30322 | 3.19E-05 | 0.000670 | SON           | SON DNA binding protein [Source:HGNC Symbol;Acc:HGNC:11183]                                       |
| ENSG00000147475 | 1.29421 | 7.70478  | 17.09069 | 3.56E-05 | 0.000728 | ERLIN2        | ER lipid raft associated 2 [Source:HGNC Symbol;Acc:HGNC:1356]                                     |
| ENSG00000142864 | 0.84117 | 8.39429  | 17.10256 | 3.54E-05 | 0.000728 | SERP1         | SERPINE1 mRNA binding protein 1 [Source:HGNC Symbol;Acc:HGNC:17860]                               |
| ENSG00000166741 | 2.42305 | 7.37522  | 16.60714 | 4.60E-05 | 0.000901 | NNMT          | nicotinamide N-methyltransferase [Source:HGNC Symbol;Acc:HGNC:7861]                               |
| ENSG00000277443 | 0.50345 | 9.75373  | 16.35836 | 5.24E-05 | 0.000987 | MARCKS        | myristoylated alanine rich protein kinase C substrate [Source:HGNC Symbol;Acc:HGNC:6759]          |
| ENSG00000173692 | 0.88513 | 8.79821  | 16.20900 | 5.67E-05 | 0.001040 | PSMD1         | proteasome 26S subunit, non-ATPase 1 [Source:HGNC Symbol;Acc:HGNC:9554]                           |
| ENSG00000184432 | 0.89617 | 8.79262  | 16.01453 | 6.29E-05 | 0.001141 | COPB2         | coatamer protein complex subunit beta 2 [Source:HGNC Symbol;Acc:HGNC:2232]                        |
| ENSG00000163520 | 0.74055 | 9.80336  | 15.50788 | 8.22E-05 | 0.001475 | FBLN2         | fibulin 2 [Source:HGNC Symbol;Acc:HGNC:3601]                                                      |
| ENSG00000070756 | 1.18953 | 7.85224  | 15.40760 | 8.66E-05 | 0.001540 | PABPC1        | poly(A) binding protein cytoplasmic 1 [Source:HGNC Symbol;Acc:HGNC:8554]                          |
| ENSG00000078018 | 2.45636 | 7.11836  | 15.32270 | 9.06E-05 | 0.001594 | MAP2          | microtubule associated protein 2 [Source:HGNC Symbol;Acc:HGNC:6839]                               |
| ENSG00000158417 | 2.12771 | 6.89489  | 15.08687 | 0.000103 | 0.001753 | EIF5B         | eukaryotic translation initiation factor 5B [Source:HGNC Symbol;Acc:HGNC:30793]                   |
| ENSG00000100442 | 0.85163 | 8.20422  | 14.41330 | 0.000147 | 0.002481 | FKBP3         | FK506 binding protein 3 [Source:HGNC Symbol;Acc:HGNC:3719]                                        |
| ENSG00000187955 | 0.61647 | 11.49944 | 14.22497 | 0.000162 | 0.002604 | COL14A1       | collagen type XIV alpha 1 chain [Source:HGNC Symbol;Acc:HGNC:2191]                                |
| ENSG00000135316 | 0.52667 | 9.38945  | 14.21464 | 0.000163 | 0.002604 | SYNCRIP       | synaptotagmin binding cytoplasmic RNA interacting protein [Source:HGNC Symbol;Acc:HGNC:16918]     |
| ENSG00000102241 | 1.84621 | 6.98484  | 14.14472 | 0.000169 | 0.002606 | HTATSF1       | HIV-1 Tat specific factor 1 [Source:HGNC Symbol;Acc:HGNC:5276]                                    |
| ENSG00000162191 | 1.62760 | 7.13907  | 14.15891 | 0.000168 | 0.002606 | UBXN1         | UBX domain protein 1 [Source:HGNC Symbol;Acc:HGNC:18402]                                          |
| ENSG00000163453 | 1.47188 | 7.24300  | 13.89760 | 0.000193 | 0.002894 | IGFBP7        | insulin like growth factor binding protein 7 [Source:HGNC Symbol;Acc:HGNC:5476]                   |
| ENSG00000119640 | 1.65953 | 7.09315  | 13.76252 | 0.000207 | 0.003005 | ACY1          | acylphosphatase 1 [Source:HGNC Symbol;Acc:HGNC:179]                                               |
| ENSG00000166165 | 0.49900 | 10.49258 | 13.70337 | 0.000214 | 0.003067 | CKB           | creatine kinase B [Source:HGNC Symbol;Acc:HGNC:1991]                                              |
| ENSG00000247596 | 1.31033 | 7.39852  | 13.27525 | 0.000269 | 0.003680 | TWF2          | twinfilin actin binding protein 2 [Source:HGNC Symbol;Acc:HGNC:9621]                              |
| ENSG00000180817 | 0.42389 | 9.86849  | 12.89317 | 0.000330 | 0.004407 | PPA1          | pyrophosphatase (inorganic) 1 [Source:HGNC Symbol;Acc:HGNC:9226]                                  |
| ENSG00000170476 | 1.20862 | 8.70125  | 12.86970 | 0.000334 | 0.004429 | MZB1          | marginal zone B and B1 cell specific protein [Source:HGNC Symbol;Acc:HGNC:30125]                  |
| ENSG00000110075 | 2.37618 | 6.56709  | 12.83413 | 0.000340 | 0.004479 | PPP6R3        | protein phosphatase 6 regulatory subunit 3 [Source:HGNC Symbol;Acc:HGNC:1173]                     |
| ENSG00000127527 | 0.78242 | 8.34436  | 12.36664 | 0.000437 | 0.005666 | EPS15L1       | epidermal growth factor receptor pathway substrate 15 like 1 [Source:HGNC Symbol;Acc:HGNC:24634]  |
| ENSG00000121769 | 1.20774 | 7.78707  | 12.33514 | 0.000445 | 0.005719 | FABP3         | fatty acid binding protein 3 [Source:HGNC Symbol;Acc:HGNC:3557]                                   |
| ENSG00000150593 | 1.04568 | 8.19717  | 12.19895 | 0.000478 | 0.006089 | PDCD4         | programmed cell death 4 [Source:HGNC Symbol;Acc:HGNC:8763]                                        |
| ENSG00000106804 | 0.77981 | 9.63506  | 12.19046 | 0.000480 | 0.006089 | C5            | complement C5 [Source:HGNC Symbol;Acc:HGNC:1331]                                                  |
| ENSG00000140905 | 1.79804 | 6.95702  | 12.07916 | 0.000510 | 0.006414 | GCSH          | glycine cleavage system protein H [Source:HGNC Symbol;Acc:HGNC:4208]                              |
| ENSG00000172403 | 1.71813 | 8.85307  | 12.06642 | 0.000513 | 0.006414 | SYNPO2        | synaptopodin 2 [Source:HGNC Symbol;Acc:HGNC:17732]                                                |
| ENSG00000221823 | 2.04010 | 6.71928  | 12.00846 | 0.000530 | 0.006521 | PPP3R1        | protein phosphatase 3 regulatory subunit B, alpha [Source:HGNC Symbol;Acc:HGNC:9317]              |
| ENSG00000114354 | 1.44964 | 7.33921  | 11.98907 | 0.000535 | 0.006521 | TFG           | TRK-fused gene [Source:HGNC Symbol;Acc:HGNC:11758]                                                |
| ENSG00000117906 | 1.10966 | 7.66889  | 11.98210 | 0.000537 | 0.006521 | RCN2          | reticulocalbin 2 [Source:HGNC Symbol;Acc:HGNC:9935]                                               |
| ENSG00000125844 | 0.55935 | 10.86402 | 11.91738 | 0.000556 | 0.006705 | RRBP1         | ribosome binding protein 1 [Source:HGNC Symbol;Acc:HGNC:10448]                                    |
| ENSG00000143401 | 0.75234 | 8.41091  | 11.83139 | 0.000582 | 0.006973 | ANP32E        | acidic nuclear phosphoprotein 32 family member E [Source:HGNC Symbol;Acc:HGNC:16673]              |
| ENSG00000100348 | 1.68418 | 6.93132  | 11.78711 | 0.000596 | 0.007091 | TXN2          | thioredoxin 2 [Source:HGNC Symbol;Acc:HGNC:17772]                                                 |
| ENSG00000172939 | 1.10644 | 7.76717  | 11.70659 | 0.000623 | 0.007304 | OXR1          | oxidative stress responsive 1 [Source:HGNC Symbol;Acc:HGNC:8508]                                  |
| ENSG00000101856 | 1.29083 | 7.27950  | 11.62953 | 0.000649 | 0.007461 | PGRMC1        | progesterone receptor membrane component 1 [Source:HGNC Symbol;Acc:HGNC:16090]                    |
| ENSG00000213619 | 0.99287 | 7.89313  | 11.56804 | 0.000671 | 0.007660 | NDUFS3        | NADH:ubiquinone oxidoreductase core subunit S3 [Source:HGNC Symbol;Acc:HGNC:7710]                 |
| ENSG00000164258 | 1.35936 | 7.43260  | 11.52145 | 0.000688 | 0.007784 | NDUFS4        | NADH:ubiquinone oxidoreductase subunit S4 [Source:HGNC Symbol;Acc:HGNC:7711]                      |
| ENSG00000116161 | 0.69384 | 8.35646  | 11.50585 | 0.000694 | 0.007784 | CACYBP        | calyculin binding protein [Source:HGNC Symbol;Acc:HGNC:30423]                                     |
| ENSG00000166482 | 0.66331 | 9.29411  | 11.40976 | 0.000731 | 0.008126 | MFAP4         | microfibrillar associated protein 4 [Source:HGNC Symbol;Acc:HGNC:7035]                            |
| ENSG00000184357 | 0.80869 | 8.05779  | 11.37737 | 0.000743 | 0.008216 | HIST1H1B      | histone cluster 1 H1 family member b [Source:HGNC Symbol;Acc:HGNC:4719]                           |
| ENSG00000183963 | 2.37825 | 7.21158  | 11.29993 | 0.000775 | 0.008457 | SMTN          | smoothelin [Source:HGNC Symbol;Acc:HGNC:11126]                                                    |
| ENSG00000111642 | 2.04250 | 6.73210  | 11.18843 | 0.000823 | 0.008925 | CHD4          | chromodomain helicase DNA binding protein 4 [Source:HGNC Symbol;Acc:HGNC:1919]                    |
| ENSG00000123131 | 1.08580 | 8.09242  | 11.11809 | 0.000855 | 0.009154 | PRDX4         | peroxiredoxin 4 [Source:HGNC Symbol;Acc:HGNC:17169]                                               |
| ENSG00000141741 | 2.01209 | 6.98172  | 10.94742 | 0.000937 | 0.009794 | MIEN1         | migration and invasion enhancer 1 [Source:HGNC Symbol;Acc:HGNC:28230]                             |
| ENSG00000121022 | 1.60576 | 7.03050  | 10.88269 | 0.000971 | 0.009935 | COP5          | COP9 signalosome subunit 5 [Source:HGNC Symbol;Acc:HGNC:2240]                                     |
| ENSG00000145050 | 1.22339 | 7.49081  | 10.82759 | 0.001000 | 0.010141 | MANF          | mesencephalic astrocyte derived neurotrophic factor [Source:HGNC Symbol;Acc:HGNC:15461]           |
| ENSG00000205339 | 1.41559 | 7.14156  | 10.78367 | 0.001024 | 0.010204 | IPO7          | importin 7 [Source:HGNC Symbol;Acc:HGNC:9852]                                                     |
| ENSG00000029725 | 2.10771 | 6.86284  | 10.50780 | 0.001189 | 0.011578 | RABEP1        | rabaptin, RAB GTPase binding effector protein 1 [Source:HGNC Symbol;Acc:HGNC:17677]               |
| ENSG00000136842 | 0.93789 | 8.19258  | 10.48158 | 0.001206 | 0.011612 | TMOD1         | tropomodulin 1 [Source:HGNC Symbol;Acc:HGNC:11871]                                                |
| ENSG00000142552 | 1.76826 | 7.08522  | 10.42204 | 0.001245 | 0.011    |               |                                                                                                   |

DE proteins comb FDR 0.05 up

| Ensembl gene    | logFC   | logCPM   | LR       | PValue   | adj.p    | gene     | geneDescription                                                                                   |
|-----------------|---------|----------|----------|----------|----------|----------|---------------------------------------------------------------------------------------------------|
| ENSG00000177954 | 1.58926 | 6.77895  | 10.10305 | 0.001480 | 0.013291 | RPS27    | ribosomal protein S27 [Source:HGNC Symbol;Acc:HGNC:10416]                                         |
| ENSG00000152795 | 0.56674 | 8.74921  | 10.03331 | 0.001537 | 0.013592 | HNRNPDL  | heterogeneous nuclear ribonucleoprotein D like [Source:HGNC Symbol;Acc:HGNC:5037]                 |
| ENSG00000136854 | 1.69990 | 6.80898  | 9.93424  | 0.001622 | 0.014197 | STXBP1   | syntaxin binding protein 1 [Source:HGNC Symbol;Acc:HGNC:11444]                                    |
| ENSG00000005893 | 1.08156 | 7.49738  | 9.87148  | 0.001679 | 0.014492 | LAMP2    | lysosomal associated membrane protein 2 [Source:HGNC Symbol;Acc:HGNC:6501]                        |
| ENSG00000155368 | 0.60902 | 9.34453  | 9.78387  | 0.001760 | 0.015025 | DBI      | diazepam binding inhibitor, acyl-CoA binding protein [Source:HGNC Symbol;Acc:HGNC:2690]           |
| ENSG00000163956 | 1.27303 | 7.80955  | 9.73078  | 0.001812 | 0.015389 | LRPAP1   | LDL receptor related protein associated protein 1 [Source:HGNC Symbol;Acc:HGNC:6701]              |
| ENSG00000099622 | 0.76580 | 8.02867  | 9.67956  | 0.001863 | 0.015747 | CIRBP    | cold inducible RNA binding protein [Source:HGNC Symbol;Acc:HGNC:1982]                             |
| ENSG00000125743 | 1.13487 | 7.37467  | 9.60067  | 0.001945 | 0.016278 | SNRPD2   | small nuclear ribonucleoprotein D2 polypeptide [Source:HGNC Symbol;Acc:HGNC:11159]                |
| ENSG00000106263 | 0.66166 | 8.45687  | 9.58910  | 0.001957 | 0.016302 | EIF3B    | eukaryotic translation initiation factor 3 subunit B [Source:HGNC Symbol;Acc:HGNC:3280]           |
| ENSG00000132485 | 1.94555 | 6.99599  | 9.48384  | 0.002073 | 0.017017 | ZRANB2   | zinc finger RANBP2-type containing 2 [Source:HGNC Symbol;Acc:HGNC:13058]                          |
| ENSG00000130175 | 0.31806 | 10.38903 | 9.46988  | 0.002089 | 0.017066 | PRKCSH   | protein kinase C substrate 80K-H [Source:HGNC Symbol;Acc:HGNC:9411]                               |
| ENSG00000115884 | 1.61976 | 6.75134  | 9.42656  | 0.002139 | 0.017305 | SDC1     | syndecan 1 [Source:HGNC Symbol;Acc:HGNC:10658]                                                    |
| ENSG00000023228 | 0.99326 | 8.36746  | 9.41848  | 0.002148 | 0.017305 | NDUFS1   | NADH:ubiquinone oxidoreductase core subunit S1 [Source:HGNC Symbol;Acc:HGNC:7707]                 |
| ENSG00000088367 | 1.12198 | 7.34533  | 9.39192  | 0.002179 | 0.017476 | EPB41L1  | erythrocyte membrane protein band 4.1 like 1 [Source:HGNC Symbol;Acc:HGNC:3378]                   |
| ENSG00000111786 | 0.88674 | 7.96805  | 9.38270  | 0.002190 | 0.017483 | SRSF9    | serine and arginine rich splicing factor 9 [Source:HGNC Symbol;Acc:HGNC:10791]                    |
| ENSG00000100941 | 1.01992 | 7.48999  | 9.19519  | 0.002427 | 0.018929 | PNN      | pinin, desmosome associated protein [Source:HGNC Symbol;Acc:HGNC:9162]                            |
| ENSG00000198380 | 1.83660 | 7.04375  | 9.17517  | 0.002453 | 0.018993 | GFPT1    | glutamine--fructose-6-phosphate transaminase 1 [Source:HGNC Symbol;Acc:HGNC:4241]                 |
| ENSG00000133706 | 1.26230 | 7.26335  | 9.17255  | 0.002457 | 0.018993 | LARS     | leucyl-tRNA synthetase [Source:HGNC Symbol;Acc:HGNC:6512]                                         |
| ENSG00000164830 | 1.79061 | 7.00280  | 9.13785  | 0.002504 | 0.019184 | OXR1     | oxidation resistance 1 [Source:HGNC Symbol;Acc:HGNC:15822]                                        |
| ENSG00000136193 | 0.76397 | 8.29945  | 9.07135  | 0.002596 | 0.019719 | SCRN1    | secernin 1 [Source:HGNC Symbol;Acc:HGNC:22192]                                                    |
| ENSG00000182512 | 1.19803 | 7.19532  | 9.02033  | 0.002670 | 0.020013 | GLRX5    | glutaredoxin 5 [Source:HGNC Symbol;Acc:HGNC:20134]                                                |
| ENSG00000106853 | 1.59008 | 7.34472  | 9.00054  | 0.002699 | 0.020020 | PTGR1    | prostaglandin reductase 1 [Source:HGNC Symbol;Acc:HGNC:18429]                                     |
| ENSG00000108821 | 1.24378 | 7.59302  | 8.99604  | 0.002706 | 0.020020 | COL1A1   | collagen type I alpha 1 chain [Source:HGNC Symbol;Acc:HGNC:2197]                                  |
| ENSG00000108465 | 1.69346 | 7.11116  | 8.82765  | 0.002967 | 0.021696 | CDK5RAP3 | CDK5 regulatory subunit associated protein 3 [Source:HGNC Symbol;Acc:HGNC:18673]                  |
| ENSG00000164754 | 1.52829 | 6.99930  | 8.82578  | 0.002970 | 0.021696 | RAD21    | RAD21 cohesin complex component [Source:HGNC Symbol;Acc:HGNC:9811]                                |
| ENSG00000085063 | 0.97207 | 7.53217  | 8.80223  | 0.003009 | 0.021765 | CD59     | CD59 molecule [Source:HGNC Symbol;Acc:HGNC:1689]                                                  |
| ENSG00000065534 | 0.38083 | 10.34490 | 8.80091  | 0.003011 | 0.021765 | MYLK     | myosin light chain kinase [Source:HGNC Symbol;Acc:HGNC:7590]                                      |
| ENSG00000113013 | 0.43555 | 10.30085 | 8.78026  | 0.003045 | 0.021874 | HSPA9    | heat shock protein family A (Hsp70) member 9 [Source:HGNC Symbol;Acc:HGNC:5244]                   |
| ENSG00000143321 | 0.36793 | 10.02498 | 8.75611  | 0.003086 | 0.021982 | HDGF     | hepatoma derived growth factor [Source:HGNC Symbol;Acc:HGNC:4856]                                 |
| ENSG00000110958 | 0.71771 | 8.75332  | 8.74768  | 0.003100 | 0.021993 | VTGES3   | prostaglandin E synthase 3 [Source:HGNC Symbol;Acc:HGNC:16049]                                    |
| ENSG00000038427 | 1.41757 | 7.74305  | 8.73422  | 0.003123 | 0.022065 | VCAN     | versican [Source:HGNC Symbol;Acc:HGNC:2464]                                                       |
| ENSG00000166228 | 1.35149 | 7.57456  | 8.64564  | 0.003278 | 0.022976 | PCBD1    | pterin-4 alpha-carbinolamine dehydratase 1 [Source:HGNC Symbol;Acc:HGNC:8646]                     |
| ENSG00000119318 | 0.38267 | 9.53995  | 8.64908  | 0.003272 | 0.022976 | RAD23B   | RAD23 homolog B, nucleotide excision repair protein [Source:HGNC Symbol;Acc:HGNC:9813]            |
| ENSG00000116120 | 1.31679 | 7.58183  | 8.61504  | 0.003334 | 0.023131 | FARSB    | phenylalanyl-tRNA synthetase beta subunit [Source:HGNC Symbol;Acc:HGNC:17800]                     |
| ENSG00000125166 | 1.23091 | 8.21647  | 8.61275  | 0.003338 | 0.023131 | GOT2     | glutamic-oxaloacetic transaminase 2 [Source:HGNC Symbol;Acc:HGNC:4433]                            |
| ENSG00000103381 | 0.82433 | 7.75809  | 8.61127  | 0.003341 | 0.023131 | CPPED1   | calcineurin like phosphoesterase domain containing 1 [Source:HGNC Symbol;Acc:HGNC:25632]          |
| ENSG00000163902 | 1.00140 | 8.13714  | 8.58105  | 0.003397 | 0.023331 | RPN1     | ribophorin I [Source:HGNC Symbol;Acc:HGNC:10381]                                                  |
| ENSG00000133789 | 0.89878 | 7.92157  | 8.58816  | 0.003384 | 0.023331 | SWAP70   | SWAP switching B-cell complex subunit 70 [Source:HGNC Symbol;Acc:HGNC:17070]                      |
| ENSG00000113758 | 0.77754 | 7.91167  | 8.54684  | 0.003461 | 0.023606 | DBN1     | drebrin 1 [Source:HGNC Symbol;Acc:HGNC:2695]                                                      |
| ENSG00000160213 | 0.61979 | 8.58023  | 8.47220  | 0.003606 | 0.024285 | CSTB     | cystatin B [Source:HGNC Symbol;Acc:HGNC:2482]                                                     |
| ENSG00000187109 | 0.55503 | 8.61420  | 8.47530  | 0.003600 | 0.024285 | NAP1L1   | nucleosome assembly protein 1 like 1 [Source:HGNC Symbol;Acc:HGNC:7637]                           |
| ENSG00000106244 | 0.96475 | 7.55883  | 8.42072  | 0.003710 | 0.024885 | PDAP1    | PDGFA associated protein 1 [Source:HGNC Symbol;Acc:HGNC:14634]                                    |
| ENSG00000136450 | 0.43568 | 9.91084  | 8.36434  | 0.003827 | 0.025478 | SRSF1    | serine and arginine rich splicing factor 1 [Source:HGNC Symbol;Acc:HGNC:10780]                    |
| ENSG00000163818 | 1.62677 | 7.54969  | 8.27438  | 0.004021 | 0.026511 | LZTFL1   | leucine zipper transcription factor like 1 [Source:HGNC Symbol;Acc:HGNC:6741]                     |
| ENSG0000011454  | 1.59643 | 6.66985  | 8.27549  | 0.004018 | 0.026511 | RABGAP1  | RAB GTPase activating protein 1 [Source:HGNC Symbol;Acc:HGNC:17155]                               |
| ENSG00000108561 | 0.62754 | 8.81543  | 8.27074  | 0.004029 | 0.026511 | C1QBP    | complement C1q binding protein [Source:HGNC Symbol;Acc:HGNC:1243]                                 |
| ENSG00000120705 | 0.84845 | 7.75251  | 8.24860  | 0.004078 | 0.026734 | ETF1     | eukaryotic translation termination factor 1 [Source:HGNC Symbol;Acc:HGNC:3477]                    |
| ENSG00000105887 | 0.61983 | 8.54982  | 8.21537  | 0.004154 | 0.027125 | MTPN     | myotrophin [Source:HGNC Symbol;Acc:HGNC:15667]                                                    |
| ENSG0000011304  | 0.37216 | 9.58864  | 8.15286  | 0.004299 | 0.027865 | PTBP1    | polypyrimidine tract binding protein 1 [Source:HGNC Symbol;Acc:HGNC:9583]                         |
| ENSG00000113643 | 1.13348 | 7.68170  | 8.12388  | 0.004369 | 0.028208 | RARS     | arginyl-tRNA synthetase [Source:HGNC Symbol;Acc:HGNC:9870]                                        |
| ENSG00000135842 | 0.93124 | 7.84149  | 8.10459  | 0.004415 | 0.028403 | FAM129A  | family with sequence similarity 129 member A [Source:HGNC Symbol;Acc:HGNC:16784]                  |
| ENSG00000176788 | 0.44133 | 9.36601  | 8.08839  | 0.004455 | 0.028552 | BASP1    | brain abundant membrane attached signal protein 1 [Source:HGNC Symbol;Acc:HGNC:957]               |
| ENSG00000107317 | 1.28415 | 7.12876  | 8.02227  | 0.004621 | 0.029286 | PTGDS    | prostaglandin D2 synthase [Source:HGNC Symbol;Acc:HGNC:9592]                                      |
| ENSG00000159212 | 1.19115 | 8.73217  | 7.99497  | 0.004691 | 0.029514 | CLIC6    | chloride intracellular channel 6 [Source:HGNC Symbol;Acc:HGNC:2065]                               |
| ENSG00000126777 | 0.51360 | 10.43675 | 7.83855  | 0.005114 | 0.031831 | KTN1     | kinectin 1 [Source:HGNC Symbol;Acc:HGNC:6467]                                                     |
| ENSG00000133226 | 1.25995 | 7.17572  | 7.80812  | 0.005201 | 0.032255 | SRRM1    | serine and arginine repetitive matrix 1 [Source:HGNC Symbol;Acc:HGNC:16638]                       |
| ENSG00000147649 | 0.89013 | 7.60465  | 7.76625  | 0.005323 | 0.032659 | MTDH     | metadherin [Source:HGNC Symbol;Acc:HGNC:29608]                                                    |
| ENSG00000137124 | 1.82284 | 7.05053  | 7.72059  | 0.005459 | 0.033258 | ALDH1B1  | aldehyde dehydrogenase 1 family member B1 [Source:HGNC Symbol;Acc:HGNC:407]                       |
| ENSG00000070814 | 1.17629 | 7.67482  | 7.64035  | 0.005708 | 0.034526 | TCOF1    | treacle ribosome biogenesis factor 1 [Source:HGNC Symbol;Acc:HGNC:11654]                          |
| ENSG00000134440 | 0.77568 | 8.22441  | 7.61030  | 0.005804 | 0.034984 | NARS     | asparaginyl-tRNA synthetase [Source:HGNC Symbol;Acc:HGNC:7643]                                    |
| ENSG00000126524 | 0.60139 | 8.25413  | 7.57852  | 0.005907 | 0.035336 | SBDS     | SBDS ribosome assembly guanine nucleotide exchange factor [Source:HGNC Symbol;Acc:HGNC:19440]     |
| ENSG00000069275 | 0.96357 | 7.87618  | 7.56039  | 0.005967 | 0.035470 | NUCKS1   | nuclear casein kinase and cyclin dependent kinase substrate 1 [Source:HGNC Symbol;Acc:HGNC:29923] |
| ENSG00000117899 | 0.76598 | 7.84490  | 7.52377  | 0.006089 | 0.035916 | MESDC2   | mesoderm development candidate 2 [Source:HGNC Symbol;Acc:HGNC:13520]                              |
| ENSG00000065613 | 0.70897 | 7.92264  | 7.51318  | 0.006125 | 0.035916 | SLK      | STE20 like kinase [Source:HGNC Symbol;Acc:HGNC:11088]                                             |
| ENSG00000196531 | 0.49920 | 8.68219  | 7.50599  | 0.006149 | 0.035938 | NACA     | nascent polypeptide-associated complex alpha subunit [Source:HGNC Symbol;Acc:HGNC:7629]           |
| ENSG00000118939 | 0.68358 | 7.89735  | 7.43285  | 0.006404 | 0.037176 | UCHL3    | ubiquitin C-terminal hydrolase L3 [Source:HGNC Symbol;Acc:HGNC:12515]                             |
| ENSG00000131725 | 1.13110 | 7.27239  | 7.36518  | 0.006650 | 0.038471 | WDR44    | WD repeat domain 44 [Source:HGNC Symbol;Acc:HGNC:30512]                                           |
| ENSG00000170017 | 1.61385 | 7.35713  | 7.20276  | 0.007279 | 0.041011 | ALCAM    | activated leukocyte cell adhesion molecule [Source:HGNC Symbol;Acc:HGNC:400]                      |
| ENSG00000004700 | 1.10938 | 7.30187  | 7.20464  | 0.007272 | 0.041011 | RECQL    | RecQ like helicase [Source:HGNC Symbol;Acc:HGNC:9948]                                             |
| ENSG00000198589 | 1.10267 | 7.80885  | 7.20456  | 0.007272 | 0.041011 | LRBA     | LPS responsive beige-like anchor protein [Source:HGNC Symbol;Acc:HGNC:1742]                       |
| ENSG00000147010 | 0.91851 | 7.77556  | 7.21884  | 0.007214 | 0.041011 | SH3BP1   | SH3 domain containing kinase binding protein 1 [Source:HGNC Symbol;Acc:HGNC:13867]                |
| ENSG00000072110 | 0.33648 | 11.36299 | 7.10811  | 0.007674 | 0.042538 | ACTN1    | actinin alpha 1 [Source:HGNC Symbol;Acc:HGNC:163]                                                 |
| ENSG00000140939 | 1.19093 | 7.12788  | 7.00411  | 0.008132 | 0.044395 | NOL3     | nucleolar protein 3 [Source:HGNC Symbol;Acc:HGNC:7869]                                            |
| ENSG00000039068 | 1.14570 | 7.57053  | 7.00300  | 0.008137 | 0.044395 | CDH1     | cadherin 1 [Source:HGNC Symbol;Acc:HGNC:1748]                                                     |
| ENSG00000132780 | 0.69986 | 8.21702  | 7.00866  | 0.008112 | 0.044395 | NASP     | nuclear autoantigenic sperm protein [Source:HGNC Symbol;Acc:HGNC:7644]                            |
| ENSG00000149021 | 0.91951 | 9.39535  | 6.95652  | 0.008351 | 0.045419 | SCGB1A1  | secretoglobin family 1A member 1 [Source:HGNC Symbol;Acc:HGNC:12523]                              |
| ENSG00000136068 | 0.26531 | 12.05942 | 6.94844  | 0.008389 | 0.045481 | FLNB     | filamin B [Source:HGNC Symbol;Acc:HGNC:3755]                                                      |
| ENSG00000082397 | 0.72031 | 8.59886  | 6.89066  | 0.008665 | 0.046765 | EPB41L3  | erythrocyte membrane protein band 4.1 like 3 [Source:HGNC Symbol;Acc:HGNC:3380]                   |
| ENSG00000167193 | 0.44423 | 9.11476  | 6.88747  | 0.008680 | 0.046765 | CRK      | CRK proto-oncogene, adaptor protein [Source:HGNC Symbol;Acc:HGNC:2362]                            |
| ENSG00000174059 | 1.03007 | 7.18482  | 6.83715  | 0.008928 | 0.047653 | CD34     | CD34 molecule [Source:HGNC Symbol;Acc:HGNC:1662]                                                  |
| ENSG00000122218 | 0.59310 | 8.90191  | 6.74017  | 0.009427 | 0.049834 | COPA     | coatamer protein complex subunit alpha [Source:HGNC Symbol;Acc:HGNC:2230]                         |

DE proteins comb FDR 0.05 down

| Ensembl gene    | logFC    | logCPM   | LR       | PValue   | adj_p    | gene     | geneDescription                                                                                                            |
|-----------------|----------|----------|----------|----------|----------|----------|----------------------------------------------------------------------------------------------------------------------------|
| ENSG0000013016  | -2.81437 | 7.60025  | 46.93976 | 7.32E-12 | 6.31E-09 | EHD3     | EH domain containing 3 [Source:HGNC Symbol;Acc:HGNC:3244]                                                                  |
| ENSG0000049860  | -1.62317 | 8.44118  | 45.30247 | 1.69E-11 | 9.70E-09 | HEXB     | hexosaminidase subunit beta [Source:HGNC Symbol;Acc:HGNC:4879]                                                             |
| ENSG00000115109 | -4.22378 | 6.78620  | 44.16874 | 3.01E-11 | 1.14E-08 | EPB41L5  | erythrocyte membrane protein band 4.1 like 5 [Source:HGNC Symbol;Acc:HGNC:19819]                                           |
| ENSG00000116962 | -0.78593 | 9.99436  | 40.52745 | 1.94E-10 | 4.18E-08 | NID1     | nidogen 1 [Source:HGNC Symbol;Acc:HGNC:7821]                                                                               |
| ENSG00000138772 | -0.67329 | 10.55724 | 36.63479 | 1.42E-09 | 2.41E-07 | ANXA3    | annexin A3 [Source:HGNC Symbol;Acc:HGNC:541]                                                                               |
| ENSG00000170248 | -0.72888 | 10.03715 | 35.66082 | 2.35E-09 | 3.11E-07 | PDCD6IP  | programmed cell death 6 interacting protein [Source:HGNC Symbol;Acc:HGNC:8766]                                             |
| ENSG00000164120 | -2.97731 | 7.00123  | 34.18710 | 5.01E-09 | 6.16E-07 | HPGD     | hydroxyprostaglandin dehydrogenase 15-(NAD) [Source:HGNC Symbol;Acc:HGNC:5154]                                             |
| ENSG0000034510  | -2.63016 | 7.86195  | 32.94964 | 9.46E-09 | 9.59E-07 | TMSB10   | thymosin beta 10 [Source:HGNC Symbol;Acc:HGNC:11879]                                                                       |
| ENSG00000169583 | -1.28476 | 8.52447  | 31.50627 | 1.99E-08 | 1.90E-06 | CLIC3    | chloride intracellular channel 3 [Source:HGNC Symbol;Acc:HGNC:2064]                                                        |
| ENSG00000074800 | -0.52822 | 11.21231 | 31.18070 | 2.35E-08 | 2.13E-06 | ENO1     | enolase 1 [Source:HGNC Symbol;Acc:HGNC:3350]                                                                               |
| ENSG00000205542 | -1.36636 | 10.22675 | 30.12424 | 4.05E-08 | 3.18E-06 | TMSB4X   | thymosin beta 4, X-linked [Source:HGNC Symbol;Acc:HGNC:11881]                                                              |
| ENSG00000198682 | -2.68513 | 7.34941  | 29.84082 | 4.69E-08 | 3.37E-06 | PAPSS2   | 3'-phosphoadenosine 5'-phosphosulfate synthase 2 [Source:HGNC Symbol;Acc:HGNC:8604]                                        |
| ENSG00000130702 | -0.70059 | 10.30611 | 29.57212 | 5.39E-08 | 3.72E-06 | LAMA5    | laminin subunit alpha 5 [Source:HGNC Symbol;Acc:HGNC:6485]                                                                 |
| ENSG00000167315 | -0.85452 | 9.35052  | 29.23111 | 6.42E-08 | 4.26E-06 | ACAA2    | acetyl-CoA acyltransferase 2 [Source:HGNC Symbol;Acc:HGNC:83]                                                              |
| ENSG00000168477 | -1.89982 | 9.80196  | 28.36435 | 1.00E-07 | 6.19E-06 | TNXB     | tenascin XB [Source:HGNC Symbol;Acc:HGNC:11976]                                                                            |
| ENSG00000148672 | -0.60409 | 10.23071 | 28.04081 | 1.19E-07 | 7.06E-06 | GLUD1    | glutamate dehydrogenase 1 [Source:HGNC Symbol;Acc:HGNC:4335]                                                               |
| ENSG00000111275 | -0.58721 | 11.13415 | 25.48981 | 4.45E-07 | 2.43E-05 | ALDH2    | aldehyde dehydrogenase 2 family (mitochondrial) [Source:HGNC Symbol;Acc:HGNC:404]                                          |
| ENSG00000117305 | -1.89449 | 7.09885  | 24.56437 | 7.19E-07 | 3.35E-05 | HMGCL    | 3-hydroxymethyl-3-methylglutaryl-CoA lyase [Source:HGNC Symbol;Acc:HGNC:5005]                                              |
| ENSG00000185651 | -2.62409 | 6.68901  | 22.83721 | 1.76E-06 | 7.07E-05 | UBE2L3   | ubiquitin conjugating enzyme E2 L3 [Source:HGNC Symbol;Acc:HGNC:12488]                                                     |
| ENSG00000120708 | -1.10469 | 8.79839  | 22.45474 | 2.15E-06 | 8.20E-05 | TGFB1    | transforming growth factor beta induced [Source:HGNC Symbol;Acc:HGNC:11771]                                                |
| ENSG00000138758 | -0.91505 | 8.56043  | 22.42345 | 2.19E-06 | 8.20E-05 | sep-11   | septin 11 [Source:HGNC Symbol;Acc:HGNC:25589]                                                                              |
| ENSG00000198561 | -1.00289 | 8.92156  | 22.29616 | 2.34E-06 | 8.57E-05 | CTNND1   | catenin delta 1 [Source:HGNC Symbol;Acc:HGNC:2515]                                                                         |
| ENSG00000168028 | -2.79684 | 6.67506  | 21.97445 | 2.76E-06 | 9.72E-05 | RPSA     | ribosomal protein SA [Source:HGNC Symbol;Acc:HGNC:6502]                                                                    |
| ENSG00000178209 | -0.44279 | 13.14757 | 21.54167 | 3.46E-06 | 0.000119 | PLEC     | plectin [Source:HGNC Symbol;Acc:HGNC:9069]                                                                                 |
| ENSG00000168610 | -1.06382 | 8.50305  | 21.42241 | 3.68E-06 | 0.000125 | STAT3    | signal transducer and activator of transcription 3 [Source:HGNC Symbol;Acc:HGNC:11364]                                     |
| ENSG00000164687 | -0.78815 | 10.71858 | 20.91265 | 4.81E-06 | 0.000156 | FABP5    | fatty acid binding protein 5 [Source:HGNC Symbol;Acc:HGNC:3560]                                                            |
| ENSG00000168036 | -0.60022 | 9.45389  | 20.74630 | 5.24E-06 | 0.000167 | CTNBN1   | catenin beta 1 [Source:HGNC Symbol;Acc:HGNC:2514]                                                                          |
| ENSG00000165140 | -0.76401 | 10.02198 | 20.66684 | 5.47E-06 | 0.000171 | FBP1     | fructose-bisphosphatase 1 [Source:HGNC Symbol;Acc:HGNC:3606]                                                               |
| ENSG00000075618 | -0.87128 | 8.96380  | 20.47313 | 6.05E-06 | 0.000180 | FSCN1    | fascin actin-bundling protein 1 [Source:HGNC Symbol;Acc:HGNC:11148]                                                        |
| ENSG00000143149 | -0.62506 | 9.42968  | 19.69623 | 9.08E-06 | 0.000257 | ALDH9A1  | aldehyde dehydrogenase 9 family member A1 [Source:HGNC Symbol;Acc:HGNC:412]                                                |
| ENSG00000151552 | -1.15301 | 7.92922  | 19.51608 | 9.98E-06 | 0.000277 | QDPR     | quinoid dihydropteridine reductase [Source:HGNC Symbol;Acc:HGNC:9752]                                                      |
| ENSG00000157500 | -1.63113 | 7.83715  | 19.19308 | 1.18E-05 | 0.000311 | APPL1    | adaptor protein, phosphotyrosine interacting with PH domain and leucine zipper 1 [Source:HGNC Symbol;Acc:HGNC:24035]       |
| ENSG00000079739 | -0.55251 | 10.28301 | 19.17552 | 1.19E-05 | 0.000311 | PGM1     | phosphoglucomutase 1 [Source:HGNC Symbol;Acc:HGNC:8905]                                                                    |
| ENSG00000167815 | -0.42962 | 10.94033 | 19.22501 | 1.16E-05 | 0.000311 | PRDX2    | peroxiredoxin 2 [Source:HGNC Symbol;Acc:HGNC:9353]                                                                         |
| ENSG00000131238 | -1.59834 | 7.78955  | 18.74933 | 1.49E-05 | 0.000367 | PPT1     | palmitoyl-protein thioesterase 1 [Source:HGNC Symbol;Acc:HGNC:9325]                                                        |
| ENSG00000148484 | -0.79475 | 8.96716  | 18.48101 | 1.72E-05 | 0.000415 | RSU1     | Ras suppressor protein 1 [Source:HGNC Symbol;Acc:HGNC:10464]                                                               |
| ENSG00000136830 | -0.66774 | 9.05140  | 18.29120 | 1.90E-05 | 0.000442 | FAM129B  | family with sequence similarity 129 member B [Source:HGNC Symbol;Acc:HGNC:25282]                                           |
| ENSG00000172725 | -0.71013 | 8.75826  | 18.23431 | 1.95E-05 | 0.000449 | CORO1B   | coronin 1B [Source:HGNC Symbol;Acc:HGNC:2253]                                                                              |
| ENSG00000186522 | -1.42743 | 7.34817  | 18.12863 | 2.06E-05 | 0.000468 | sep-10   | septin 10 [Source:HGNC Symbol;Acc:HGNC:14349]                                                                              |
| ENSG00000131236 | -0.36498 | 10.96810 | 17.68973 | 2.60E-05 | 0.000575 | CAP1     | adenylate cyclase associated protein 1 [Source:HGNC Symbol;Acc:HGNC:20040]                                                 |
| ENSG00000117748 | -2.21436 | 6.94211  | 17.61189 | 2.71E-05 | 0.000591 | RPA2     | replication protein A2 [Source:HGNC Symbol;Acc:HGNC:10290]                                                                 |
| ENSG00000187498 | -0.91617 | 8.16199  | 17.46597 | 2.92E-05 | 0.000630 | COL4A1   | collagen type IV alpha 1 chain [Source:HGNC Symbol;Acc:HGNC:2202]                                                          |
| ENSG00000111237 | -1.05794 | 7.78086  | 17.07758 | 3.59E-05 | 0.000728 | VPS29    | VPS29, retromer complex component [Source:HGNC Symbol;Acc:HGNC:14340]                                                      |
| ENSG00000111640 | -0.31294 | 11.28062 | 16.98394 | 3.77E-05 | 0.000756 | GAPDH    | glyceraldehyde-3-phosphate dehydrogenase [Source:HGNC Symbol;Acc:HGNC:4141]                                                |
| ENSG00000087274 | -0.57813 | 9.65633  | 16.65898 | 4.47E-05 | 0.000887 | ADD1     | adducin 1 [Source:HGNC Symbol;Acc:HGNC:243]                                                                                |
| ENSG00000148671 | -0.92272 | 8.62570  | 16.58183 | 4.66E-05 | 0.000903 | ADIRF    | adipogenesis regulatory factor [Source:HGNC Symbol;Acc:HGNC:24043]                                                         |
| ENSG00000089159 | -1.13856 | 8.11424  | 16.48403 | 4.91E-05 | 0.000940 | PXN      | paxillin [Source:HGNC Symbol;Acc:HGNC:9718]                                                                                |
| ENSG00000104763 | -0.81676 | 9.88523  | 16.34924 | 5.27E-05 | 0.000987 | ASAH1    | N-acylsphingosine amidohydrolase 1 [Source:HGNC Symbol;Acc:HGNC:735]                                                       |
| ENSG00000117984 | -0.66079 | 11.03541 | 16.29752 | 5.41E-05 | 0.001004 | CTSD     | cathepsin D [Source:HGNC Symbol;Acc:HGNC:2529]                                                                             |
| ENSG00000142507 | -0.89179 | 8.01377  | 15.29113 | 9.21E-05 | 0.001605 | PSMB6    | proteasome subunit beta 6 [Source:HGNC Symbol;Acc:HGNC:9543]                                                               |
| ENSG00000197879 | -0.58587 | 10.90308 | 15.21060 | 9.26E-05 | 0.001658 | MYO1C    | myosin 1C [Source:HGNC Symbol;Acc:HGNC:7597]                                                                               |
| ENSG00000137486 | -0.69422 | 8.72915  | 14.39144 | 0.000148 | 0.002485 | ARRB1    | arrestin beta 1 [Source:HGNC Symbol;Acc:HGNC:711]                                                                          |
| ENSG00000100034 | -0.96078 | 8.04498  | 14.22497 | 0.000162 | 0.002604 | PPM1F    | protein phosphatase, Mg <sup>2+</sup> /Mn <sup>2+</sup> dependent 1F [Source:HGNC Symbol;Acc:HGNC:19388]                   |
| ENSG00000079308 | -0.58554 | 10.67421 | 14.22027 | 0.000163 | 0.002604 | TNS1     | tensin 1 [Source:HGNC Symbol;Acc:HGNC:11973]                                                                               |
| ENSG00000139684 | -0.58006 | 9.11822  | 14.28374 | 0.000157 | 0.002604 | ESD      | esterase D [Source:HGNC Symbol;Acc:HGNC:3465]                                                                              |
| ENSG00000188612 | -1.62043 | 6.95224  | 14.19596 | 0.000165 | 0.002605 | SUMO2    | small ubiquitin-like modifier 2 [Source:HGNC Symbol;Acc:HGNC:11125]                                                        |
| ENSG00000071127 | -0.41306 | 10.27655 | 14.17796 | 0.000166 | 0.002606 | WDR1     | WD repeat domain 1 [Source:HGNC Symbol;Acc:HGNC:12754]                                                                     |
| ENSG00000111144 | -0.36292 | 11.09456 | 14.07455 | 0.000176 | 0.002681 | LTA4H    | leukotriene A4 hydrolase [Source:HGNC Symbol;Acc:HGNC:6710]                                                                |
| ENSG00000198830 | -1.91572 | 7.39637  | 13.96539 | 0.000186 | 0.002816 | HMGN2    | high mobility group nucleosomal binding domain 2 [Source:HGNC Symbol;Acc:HGNC:4986]                                        |
| ENSG00000148180 | -0.44652 | 11.75755 | 13.84097 | 0.000199 | 0.002957 | GSN      | gelsolin [Source:HGNC Symbol;Acc:HGNC:4620]                                                                                |
| ENSG0000024422  | -0.54612 | 11.60422 | 13.82184 | 0.000201 | 0.002962 | EHD2     | EH domain containing 2 [Source:HGNC Symbol;Acc:HGNC:3243]                                                                  |
| ENSG00000141295 | -1.90165 | 6.70962  | 13.77987 | 0.000206 | 0.003083 | SCRN2    | secernin 2 [Source:HGNC Symbol;Acc:HGNC:30381]                                                                             |
| ENSG00000115091 | -0.44529 | 10.19418 | 13.69312 | 0.000215 | 0.003067 | ACTR3    | ARP3 actin related protein 3 homolog [Source:HGNC Symbol;Acc:HGNC:170]                                                     |
| ENSG00000137106 | -0.81005 | 8.35924  | 13.55918 | 0.000231 | 0.003267 | GRHPR    | glyoxylate and hydroxypropyl pyruvate reductase [Source:HGNC Symbol;Acc:HGNC:4570]                                         |
| ENSG00000144791 | -1.66163 | 6.95794  | 13.50726 | 0.000238 | 0.003331 | LIMD1    | LIM domains containing 1 [Source:HGNC Symbol;Acc:HGNC:6612]                                                                |
| ENSG00000143416 | -0.30756 | 11.27770 | 13.46993 | 0.000242 | 0.003370 | SELENBP1 | selenium binding protein 1 [Source:HGNC Symbol;Acc:HGNC:10719]                                                             |
| ENSG00000152642 | -0.71227 | 8.43791  | 13.38995 | 0.000253 | 0.003489 | GPD1L    | glycerol-3-phosphate dehydrogenase 1-like [Source:HGNC Symbol;Acc:HGNC:28956]                                              |
| ENSG00000213719 | -0.35412 | 10.08768 | 13.18037 | 0.000283 | 0.003840 | CLIC1    | chloride intracellular channel 1 [Source:HGNC Symbol;Acc:HGNC:2062]                                                        |
| ENSG00000147065 | -0.51164 | 11.76985 | 12.94219 | 0.000321 | 0.004327 | MSN      | moesin [Source:HGNC Symbol;Acc:HGNC:7373]                                                                                  |
| ENSG00000091136 | -0.56983 | 10.21310 | 12.81922 | 0.000343 | 0.004481 | LAMB1    | laminin subunit beta 1 [Source:HGNC Symbol;Acc:HGNC:6486]                                                                  |
| ENSG00000135047 | -1.14540 | 7.54001  | 12.00307 | 0.000531 | 0.006521 | CTSL     | cathepsin L [Source:HGNC Symbol;Acc:HGNC:2537]                                                                             |
| ENSG00000211893 | -0.93724 | 9.50038  | 11.75617 | 0.000606 | 0.007161 | IGHG2    | immunoglobulin heavy constant gamma 2 (G2m marker) [Source:HGNC Symbol;Acc:HGNC:5526]                                      |
| ENSG00000128245 | -0.41509 | 9.51027  | 11.69151 | 0.000628 | 0.007314 | YWHAH    | tyrosine 3-monooxygenase/tryptophan 5-monooxygenase activation protein eta [Source:HGNC Symbol;Acc:HGNC:12853]             |
| ENSG00000152234 | -0.26171 | 11.05594 | 11.67879 | 0.000632 | 0.007314 | ATP5A1   | ATP synthase, H+ transporting, mitochondrial F1 complex, alpha subunit 1, cardiac muscle [Source:HGNC Symbol;Acc:HGNC:823] |
| ENSG00000197894 | -0.34734 | 9.94446  | 11.50163 | 0.000695 | 0.007784 | ADH5     | alcohol dehydrogenase 5 (class III), chi polypeptide [Source:HGNC Symbol;Acc:HGNC:253]                                     |
| ENSG00000041357 | -0.51922 | 8.92687  | 11.34079 | 0.000758 | 0.008326 | PSMA4    | proteasome subunit alpha 4 [Source:HGNC Symbol;Acc:HGNC:9533]                                                              |
| ENSG00000147140 | -0.66917 | 8.81717  | 11.13491 | 0.000847 | 0.009128 | NONO     | non-POU domain containing, octamer-binding [Source:HGNC Symbol;Acc:HGNC:7871]                                              |
| ENSG00000162909 | -0.30881 | 10.68795 | 11.06825 | 0.000878 | 0.009346 | CAPN2    | calpain 2 [Source:HGNC Symbol;Acc:HGNC:1479]                                                                               |
| ENSG00000132622 | -1.19863 | 7.63038  | 11.01200 | 0.000905 | 0.009574 | HSPA12B  | heat shock protein family A (Hsp70) member 12B [Source:HGNC Symbol;Acc:HGNC:16193]                                         |
| ENSG00000120913 | -0.81599 | 9.24384  | 10.98782 | 0.000917 | 0.009641 | PDLIM2   | PDZ and LIM domain 2 [Source:HGNC Symbol;Acc:HGNC:13992]                                                                   |
| ENSG00000089220 | -0.30982 | 10.32549 | 10.91477 | 0.000954 | 0.009908 | PEBP1    | phosphatidylethanolamine binding protein 1 [Source:HGNC Symbol;Acc:HGNC:8630]                                              |
| ENSG00000219114 | -1.50599 | 6.89525  | 10.89007 | 0.000967 | 0.009935 | PPP2R2A  | protein phosphatase 2 regulatory subunit Balpha [Source:HGNC Symbol;Acc:HGNC:9304]                                         |
| ENSG00000182718 | -0.62839 | 12.76332 | 10.87649 | 0.000974 | 0.009935 | ANXA2    | annexin A2 [Source:HGNC Symbol;Acc:HGNC:537]                                                                               |
| ENSG00000140945 | -1.25614 | 7.17792  | 10.79869 | 0.001016 | 0.010204 | CDH13    | cadherin 13 [Source:HGNC Symbol;Acc:HGNC:1753]                                                                             |
| ENSG00000170889 | -1.14218 | 8.00508  | 10.79163 | 0.001020 | 0.010204 | RPS9     | ribosomal protein S9 [Source:HGNC Symbol;Acc:HGNC:10442]                                                                   |
| ENSG00000138674 | -1.19999 | 7.95625  | 10.71648 | 0.001062 | 0.010521 | SEC31A   | SEC31 homolog A, COPII coat complex component [Source:HGNC Symbol;Acc:HGNC:17052]                                          |
| ENSG00000137710 | -0.55929 | 10.31299 | 10.66668 | 0.001091 | 0.010746 | RDX      | radixin [Source:HGNC Symbol;Acc:HGNC:9944]                                                                                 |
| ENSG00000163931 | -0.35704 | 10.98953 | 10.61169 | 0.001124 | 0.011008 | TKT      | transketolase [Source:HGNC Symbol;Acc:HGNC:11834]                                                                          |
| ENSG00000140105 | -0.50595 | 10.78908 | 10.48617 | 0.001203 | 0.011612 | WARS     | tryptophanyl-tRNA synthetase [Source:HGNC Symbol;Acc:HGNC:12729]                                                           |
| ENSG00000127946 | -1.14115 | 7.31669  | 10.46498 | 0.001217 | 0.011652 | HIP1     | huntingtin interacting protein 1 [Source:HGNC Symbol;Acc:HGNC:4913]                                                        |
| ENSG00000182492 | -0.42545 | 11.14827 | 10.42142 | 0.001246 | 0.0      |          |                                                                                                                            |

DE proteins comb FDR 0.05 down

| Ensembl gene    | logFC    | logCPM   | LR      | PValue   | adj_p    | gene     | geneDescription                                                                                                 |
|-----------------|----------|----------|---------|----------|----------|----------|-----------------------------------------------------------------------------------------------------------------|
| ENSG00000160209 | -0.46378 | 9.08879  | 9.49042 | 0.002065 | 0.017017 | PDXK     | pyridoxal kinase [Source:HGNC Symbol;Acc:HGNC:8819]                                                             |
| ENSG00000123992 | -0.84255 | 8.49926  | 9.45150 | 0.002110 | 0.017157 | DNPEP    | aspartyl aminopeptidase [Source:HGNC Symbol;Acc:HGNC:2981]                                                      |
| ENSG00000159377 | -0.67867 | 8.23386  | 9.33643 | 0.002246 | 0.017847 | PSMB4    | proteasome subunit beta 4 [Source:HGNC Symbol;Acc:HGNC:9541]                                                    |
| ENSG00000104823 | -0.41538 | 9.56378  | 9.26007 | 0.002342 | 0.018521 | ECH1     | enoyl-CoA hydratase 1 [Source:HGNC Symbol;Acc:HGNC:3149]                                                        |
| ENSG00000112782 | -0.70042 | 9.39245  | 9.23870 | 0.002370 | 0.018653 | CLIC5    | chloride intracellular channel 5 [Source:HGNC Symbol;Acc:HGNC:13517]                                            |
| ENSG00000102882 | -0.60895 | 8.30738  | 9.20946 | 0.002408 | 0.018867 | MAPK3    | mitogen-activated protein kinase 3 [Source:HGNC Symbol;Acc:HGNC:6877]                                           |
| ENSG00000099204 | -1.14494 | 7.53686  | 9.16003 | 0.002474 | 0.019038 | ABLIM1   | actin binding LIM protein 1 [Source:HGNC Symbol;Acc:HGNC:78]                                                    |
| ENSG00000123130 | -0.95589 | 7.55857  | 9.12413 | 0.002523 | 0.019243 | ACOT9    | acyl-CoA thioesterase 9 [Source:HGNC Symbol;Acc:HGNC:17152]                                                     |
| ENSG00000102606 | -1.34728 | 6.93084  | 9.04925 | 0.002628 | 0.019872 | ARHGEF7  | Rho guanine nucleotide exchange factor 7 [Source:HGNC Symbol;Acc:HGNC:15607]                                    |
| ENSG00000165092 | -0.35338 | 11.07344 | 9.03835 | 0.002644 | 0.019903 | ALDH1A1  | aldehyde dehydrogenase 1 family member A1 [Source:HGNC Symbol;Acc:HGNC:402]                                     |
| ENSG00000100106 | -0.82425 | 7.80707  | 9.00586 | 0.002691 | 0.020020 | TRIOBP   | TRIO and F-actin binding protein [Source:HGNC Symbol;Acc:HGNC:17009]                                            |
| ENSG00000092964 | -0.30075 | 11.30749 | 8.82606 | 0.002970 | 0.021696 | DPYSL2   | dihydropyrimidinase like 2 [Source:HGNC Symbol;Acc:HGNC:3014]                                                   |
| ENSG00000122971 | -1.70721 | 7.13334  | 8.79695 | 0.003017 | 0.021765 | ACADS    | acyl-CoA dehydrogenase, C-2 to C-3 short chain [Source:HGNC Symbol;Acc:HGNC:90]                                 |
| ENSG00000117450 | -0.27728 | 10.26244 | 8.75627 | 0.003085 | 0.021982 | PRDX1    | peroxiredoxin 1 [Source:HGNC Symbol;Acc:HGNC:9352]                                                              |
| ENSG00000093144 | -1.04776 | 7.37762  | 8.54523 | 0.003464 | 0.023606 | ECHDC1   | ethylmalonyl-CoA decarboxylase 1 [Source:HGNC Symbol;Acc:HGNC:21489]                                            |
| ENSG00000176014 | -0.53004 | 8.55519  | 8.50462 | 0.003542 | 0.024044 | TUBB6    | tubulin beta 6 class V [Source:HGNC Symbol;Acc:HGNC:20776]                                                      |
| ENSG00000110880 | -0.51622 | 9.30890  | 8.36385 | 0.003828 | 0.025478 | CORO1C   | coronin 1C [Source:HGNC Symbol;Acc:HGNC:2254]                                                                   |
| ENSG00000213614 | -0.99091 | 8.14121  | 8.17584 | 0.004245 | 0.027618 | HEXA     | hexosaminidase subunit alpha [Source:HGNC Symbol;Acc:HGNC:4878]                                                 |
| ENSG00000073350 | -1.39623 | 6.93425  | 8.07375 | 0.004491 | 0.028578 | LLGL2    | LLGL2, scribble cell polarity complex component [Source:HGNC Symbol;Acc:HGNC:6629]                              |
| ENSG00000137497 | -0.60240 | 10.04696 | 8.07329 | 0.004492 | 0.028578 | NUMA1    | nuclear mitotic apparatus protein 1 [Source:HGNC Symbol;Acc:HGNC:8059]                                          |
| ENSG00000133835 | -0.56203 | 10.13404 | 7.99864 | 0.004681 | 0.029514 | HSD17B4  | hydroxysteroid 17-beta dehydrogenase 4 [Source:HGNC Symbol;Acc:HGNC:5213]                                       |
| ENSG00000064042 | -0.66630 | 9.39209  | 7.90131 | 0.004940 | 0.030969 | LIMCH1   | LIM and calponin homology domains 1 [Source:HGNC Symbol;Acc:HGNC:29191]                                         |
| ENSG00000105538 | -1.58621 | 6.95644  | 7.88940 | 0.004973 | 0.031060 | RASIP1   | Ras interacting protein 1 [Source:HGNC Symbol;Acc:HGNC:24716]                                                   |
| ENSG00000115306 | -0.23355 | 12.67609 | 7.78681 | 0.005263 | 0.032521 | SPTBN1   | spectrin beta, non-erythrocytic 1 [Source:HGNC Symbol;Acc:HGNC:11275]                                           |
| ENSG00000147416 | -0.75735 | 8.41172  | 7.77994 | 0.005283 | 0.032528 | ATP6V1B2 | ATPase H+ transporting V1 subunit B2 [Source:HGNC Symbol;Acc:HGNC:854]                                          |
| ENSG00000168385 | -0.38504 | 9.33881  | 7.74236 | 0.005394 | 0.032976 | sep-02   | septin 2 [Source:HGNC Symbol;Acc:HGNC:7729]                                                                     |
| ENSG00000138796 | -0.63230 | 8.70894  | 7.68641 | 0.005564 | 0.033775 | HADH     | hydroxyacyl-CoA dehydrogenase [Source:HGNC Symbol;Acc:HGNC:4799]                                                |
| ENSG00000075239 | -0.40604 | 9.42274  | 7.59587 | 0.005850 | 0.035142 | ACAT1    | acetyl-CoA acetyltransferase 1 [Source:HGNC Symbol;Acc:HGNC:93]                                                 |
| ENSG00000140416 | -0.56025 | 10.81177 | 7.57342 | 0.005924 | 0.035336 | TPM1     | tropomyosin 1 (alpha) [Source:HGNC Symbol;Acc:HGNC:12010]                                                       |
| ENSG00000176658 | -1.36749 | 7.18662  | 7.51791 | 0.006109 | 0.035916 | MYO1D    | myosin ID [Source:HGNC Symbol;Acc:HGNC:7598]                                                                    |
| ENSG00000050405 | -0.64343 | 8.66352  | 7.51324 | 0.006125 | 0.035916 | LIMA1    | LIM domain and actin binding 1 [Source:HGNC Symbol;Acc:HGNC:24636]                                              |
| ENSG00000106624 | -0.69523 | 8.11744  | 7.49032 | 0.006203 | 0.036129 | AEBP1    | AE binding protein 1 [Source:HGNC Symbol;Acc:HGNC:303]                                                          |
| ENSG00000240065 | -0.69340 | 7.90568  | 7.33449 | 0.006764 | 0.039003 | PSMB9    | proteasome subunit beta 9 [Source:HGNC Symbol;Acc:HGNC:9546]                                                    |
| ENSG00000105227 | -0.81062 | 9.81765  | 7.26831 | 0.007018 | 0.040331 | PRX      | periaxin [Source:HGNC Symbol;Acc:HGNC:13797]                                                                    |
| ENSG00000121064 | -0.96742 | 7.85582  | 7.22644 | 0.007184 | 0.041011 | SCPEP1   | serine carboxypeptidase 1 [Source:HGNC Symbol;Acc:HGNC:29507]                                                   |
| ENSG00000030582 | -0.71457 | 7.80306  | 7.21704 | 0.007221 | 0.041011 | GRN      | granulin precursor [Source:HGNC Symbol;Acc:HGNC:4601]                                                           |
| ENSG00000167460 | -0.46584 | 11.32226 | 7.17875 | 0.007377 | 0.041293 | TPM4     | tropomyosin 4 [Source:HGNC Symbol;Acc:HGNC:12013]                                                               |
| ENSG00000176619 | -0.24790 | 10.88522 | 7.18292 | 0.007360 | 0.041293 | LMNB2    | lamin B2 [Source:HGNC Symbol;Acc:HGNC:6638]                                                                     |
| ENSG00000104067 | -0.52911 | 10.12346 | 7.16914 | 0.007417 | 0.041381 | TJP1     | tight junction protein 1 [Source:HGNC Symbol;Acc:HGNC:11827]                                                    |
| ENSG00000130985 | -0.19063 | 11.08183 | 7.11151 | 0.007659 | 0.042538 | UBA1     | ubiquitin like modifier activating enzyme 1 [Source:HGNC Symbol;Acc:HGNC:12469]                                 |
| ENSG00000159840 | -0.34285 | 10.07166 | 7.07346 | 0.007823 | 0.043229 | ZYX      | zyxin [Source:HGNC Symbol;Acc:HGNC:13200]                                                                       |
| ENSG00000116774 | -0.76490 | 8.74558  | 7.05480 | 0.007905 | 0.043542 | OLFML3   | olfactomedin like 3 [Source:HGNC Symbol;Acc:HGNC:24956]                                                         |
| ENSG00000164924 | -0.23436 | 10.75497 | 6.87974 | 0.008718 | 0.046821 | YWHAZ    | tyrosine 3-monooxygenase/tryptophan 5-monooxygenase activation protein zeta [Source:HGNC Symbol;Acc:HGNC:12855] |
| ENSG00000107164 | -1.17588 | 6.87481  | 6.84991 | 0.008865 | 0.047461 | FUBP3    | far upstream element binding protein 3 [Source:HGNC Symbol;Acc:HGNC:4005]                                       |
| ENSG00000137831 | -1.09962 | 7.18332  | 6.82999 | 0.008964 | 0.047697 | UACA     | uveal autoantigen with coiled-coil domains and ankyrin repeats [Source:HGNC Symbol;Acc:HGNC:15947]              |
| ENSG00000136235 | -0.73719 | 7.99909  | 6.79111 | 0.009161 | 0.048597 | GNPMB    | glycoprotein nmb [Source:HGNC Symbol;Acc:HGNC:4462]                                                             |
| ENSG00000162517 | -1.11204 | 6.98149  | 6.73532 | 0.009452 | 0.049834 | PEF1     | penta-EF-hand domain containing 1 [Source:HGNC Symbol;Acc:HGNC:30009]                                           |

DE mRNA comb FDR 0.05 up

| Ensembl gene    | logFC   | logCPM   | LR       | PValue   | adj.p    | gene          | Description                                                                                                                 |
|-----------------|---------|----------|----------|----------|----------|---------------|-----------------------------------------------------------------------------------------------------------------------------|
| ENSG00000099860 | 2.56526 | 8.12904  | 31.47425 | 2.02E-08 | 0.000106 | GADD45B       | growth arrest and DNA-damage-inducible, beta [Source:HGNC Symbol;Acc:4096]                                                  |
| ENSG00000118503 | 1.85829 | 7.80211  | 30.35646 | 3.60E-08 | 0.000141 | TNFAIP3       | tumor necrosis factor, alpha-induced protein 3 [Source:HGNC Symbol;Acc:11896]                                               |
| ENSG00000131016 | 2.43350 | 8.74365  | 27.31879 | 1.73E-07 | 0.000446 | AKAP12        | A kinase (PRKA) anchor protein 12 [Source:HGNC Symbol;Acc:370]                                                              |
| ENSG00000148926 | 2.24012 | 8.48307  | 27.42403 | 1.63E-07 | 0.000446 | ADM           | adrenomedullin [Source:HGNC Symbol;Acc:259]                                                                                 |
| ENSG00000134107 | 1.94766 | 8.79137  | 26.35337 | 2.84E-07 | 0.000558 | BHLHE40       | basic helix-loop-helix family, member e40 [Source:HGNC Symbol;Acc:1046]                                                     |
| ENSG00000167772 | 3.57709 | 4.09445  | 25.41347 | 4.63E-07 | 0.000661 | ANGPTL4       | angiopoietin-like 4 [Source:HGNC Symbol;Acc:16039]                                                                          |
| ENSG00000172061 | 2.14974 | 2.54563  | 25.50311 | 4.42E-07 | 0.000661 | LRRC15        | leucine rich repeat containing 15 [Source:HGNC Symbol;Acc:20818]                                                            |
| ENSG00000166741 | 2.53745 | 5.48180  | 24.33523 | 8.09E-07 | 0.000978 | NNMT          | nicotinamide N-methyltransferase [Source:HGNC Symbol;Acc:7861]                                                              |
| ENSG00000163661 | 4.63690 | 4.79708  | 22.83057 | 1.77E-06 | 0.001829 | PTX3          | pentraxin 3, long [Source:HGNC Symbol;Acc:9692]                                                                             |
| ENSG00000158859 | 4.25508 | 6.27463  | 21.71486 | 3.16E-06 | 0.002761 | ADAMTS4       | ADAM metalloproteinase with thrombospondin type 1 motif, 4 [Source:HGNC Symbol;Acc:220]                                     |
| ENSG00000174727 | 1.88111 | 5.54702  | 20.61660 | 5.61E-06 | 0.004197 | IGF1          | insulin-like growth factor 1 (somatomedin C) [Source:HGNC Symbol;Acc:5464]                                                  |
| ENSG00000123496 | 4.28850 | 0.16830  | 20.46727 | 6.07E-06 | 0.004331 | IL13RA2       | interleukin 13 receptor, alpha 2 [Source:HGNC Symbol;Acc:5975]                                                              |
| ENSG00000133048 | 2.50974 | 5.54410  | 20.33529 | 6.50E-06 | 0.004439 | CHI3L1        | chitinase 3-like 1 (cartilage glycoprotein-39) [Source:HGNC Symbol;Acc:1932]                                                |
| ENSG00000162692 | 2.36663 | 5.78648  | 20.22100 | 6.90E-06 | 0.004515 | VCAM1         | vascular cell adhesion molecule 1 [Source:HGNC Symbol;Acc:12663]                                                            |
| ENSG00000162711 | 2.15092 | 3.73298  | 20.06512 | 7.48E-06 | 0.004703 | NLRP3         | NLR family, pyrin domain containing 3 [Source:HGNC Symbol;Acc:16400]                                                        |
| ENSG00000151790 | 2.93302 | 1.64327  | 19.74117 | 8.87E-06 | 0.005357 | TDO2          | tryptophan 2,3-dioxygenase [Source:HGNC Symbol;Acc:11708]                                                                   |
| ENSG00000141433 | 6.99457 | 2.74555  | 19.53261 | 9.89E-06 | 0.005477 | ADCYAP1       | adenylate cyclase activating polypeptide 1 (pituitary) [Source:HGNC Symbol;Acc:241]                                         |
| ENSG00000124216 | 2.30620 | 3.77795  | 19.49035 | 1.01E-05 | 0.005477 | SNAI1         | snail family zinc finger 1 [Source:HGNC Symbol;Acc:11128]                                                                   |
| ENSG00000187955 | 1.73106 | 6.95228  | 19.52663 | 9.92E-06 | 0.005477 | COL14A1       | collagen, type XIV, alpha 1 [Source:HGNC Symbol;Acc:2191]                                                                   |
| ENSG00000137801 | 2.96959 | 10.22978 | 18.91707 | 1.37E-05 | 0.006178 | THBS1         | thrombospondin 1 [Source:HGNC Symbol;Acc:11785]                                                                             |
| ENSG00000184557 | 2.82837 | 8.18633  | 18.93596 | 1.35E-05 | 0.006178 | SOC3          | suppressor of cytokine signaling 3 [Source:HGNC Symbol;Acc:19391]                                                           |
| ENSG00000141682 | 2.01397 | 3.08060  | 18.95506 | 1.34E-05 | 0.006178 | PM2IP1        | phorbol-12-myristate-13-acetate-induced protein 1 [Source:HGNC Symbol;Acc:9108]                                             |
| ENSG00000280143 | 1.48059 | 4.99889  | 18.79537 | 1.46E-05 | 0.006178 | NA            | NA                                                                                                                          |
| ENSG00000113083 | 1.21589 | 5.46295  | 18.87161 | 1.40E-05 | 0.006178 | LOX           | lysyl oxidase [Source:HGNC Symbol;Acc:6664]                                                                                 |
| ENSG00000102359 | 1.33735 | 3.29612  | 18.54783 | 1.66E-05 | 0.006849 | SRPX2         | sushi-repeat containing protein, X-linked 2 [Source:HGNC Symbol;Acc:30668]                                                  |
| ENSG00000105835 | 2.07754 | 9.28693  | 18.27169 | 1.92E-05 | 0.007554 | NAMPT         | nicotinamide phosphoribosyltransferase [Source:HGNC Symbol;Acc:30092]                                                       |
| ENSG00000104415 | 3.06844 | 3.44419  | 18.10769 | 2.09E-05 | 0.007610 | WISP1         | WNT1 inducible signaling pathway protein 1 [Source:HGNC Symbol;Acc:12769]                                                   |
| ENSG00000211942 | 3.00227 | 2.51402  | 18.06802 | 2.13E-05 | 0.007610 | IGHV3-13      | immunoglobulin heavy variable 3-13 [Source:HGNC Symbol;Acc:5581]                                                            |
| ENSG00000103196 | 2.24939 | 7.57113  | 18.20202 | 1.99E-05 | 0.007610 | CRISPLD2      | cysteine-rich secretory protein LCLL domain containing 2 [Source:HGNC Symbol;Acc:25248]                                     |
| ENSG00000176692 | 1.61669 | 2.33406  | 18.12911 | 2.06E-05 | 0.007610 | FOXO2         | forkhead box C2 (MZF1, mesenchyme forkhead 1) [Source:HGNC Symbol;Acc:3801]                                                 |
| ENSG00000186340 | 1.91426 | 5.31158  | 18.01316 | 2.19E-05 | 0.007658 | THBS2         | thrombospondin 2 [Source:HGNC Symbol;Acc:11786]                                                                             |
| ENSG00000157214 | 2.06353 | 6.06279  | 17.84748 | 2.39E-05 | 0.008173 | STEAP2        | STEAP family member 2, metalloreductase [Source:HGNC Symbol;Acc:17885]                                                      |
| ENSG00000108691 | 3.23126 | 7.32024  | 17.44134 | 2.96E-05 | 0.008951 | CCL2          | chemokine (C-C motif) ligand 2 [Source:HGNC Symbol;Acc:10618]                                                               |
| ENSG00000137193 | 1.68775 | 6.07551  | 17.45702 | 2.94E-05 | 0.008951 | PIM1          | pim-1 oncogene [Source:HGNC Symbol;Acc:8986]                                                                                |
| ENSG00000100644 | 1.64627 | 8.29976  | 17.53312 | 2.82E-05 | 0.008951 | HIF1A         | hypoxia inducible factor 1, alpha subunit (basic helix-loop-helix transcription factor) [Source:HGNC Symbol;Acc:4910]       |
| ENSG00000164647 | 2.04834 | 2.64174  | 17.37376 | 3.07E-05 | 0.009100 | STEAP1        | six transmembrane epithelial antigen of the prostate 1 [Source:HGNC Symbol;Acc:11378]                                       |
| ENSG00000112936 | 1.64310 | 8.52758  | 17.27891 | 3.23E-05 | 0.009302 | C7            | complement component 7 [Source:HGNC Symbol;Acc:1346]                                                                        |
| ENSG00000175592 | 4.01599 | 5.02631  | 17.12491 | 3.50E-05 | 0.009494 | FOSL1         | FOS-like antigen 1 [Source:HGNC Symbol;Acc:13718]                                                                           |
| ENSG00000163739 | 3.31244 | 5.60788  | 17.08943 | 3.57E-05 | 0.009494 | CXCL1         | chemokine (C-X-C motif) ligand 1 (melanoma growth stimulating activity, alpha) [Source:HGNC Symbol;Acc:4602]                |
| ENSG00000182752 | 2.37031 | 4.43087  | 17.07801 | 3.59E-05 | 0.009494 | PAPPA         | pregnancy-associated plasma protein A, pappalysin 1 [Source:HGNC Symbol;Acc:8602]                                           |
| ENSG00000151014 | 2.32929 | 2.73703  | 17.05743 | 3.63E-05 | 0.009494 | CCR4L1        | CCR4 carbon catabolite repression 4-like (S. cerevisiae) [Source:HGNC Symbol;Acc:14254]                                     |
| ENSG00000185022 | 2.15545 | 5.75667  | 17.14028 | 3.47E-05 | 0.009494 | MAFF          | v-maf avian musculoaponeurotic fibrosarcoma oncogene homolog F [Source:HGNC Symbol;Acc:6780]                                |
| ENSG00000169429 | 4.12921 | 5.96401  | 16.97320 | 3.79E-05 | 0.009762 | IL8           | interleukin 8 [Source:HGNC Symbol;Acc:6025]                                                                                 |
| ENSG00000136244 | 3.90898 | 7.10357  | 16.75382 | 4.26E-05 | 0.010282 | IL6           | interleukin 6 (interferon, beta 2) [Source:HGNC Symbol;Acc:6018]                                                            |
| ENSG0000007908  | 3.41265 | 4.99855  | 16.74920 | 4.27E-05 | 0.010282 | SELE          | selectin E [Source:HGNC Symbol;Acc:10718]                                                                                   |
| ENSG00000188766 | 2.86636 | 1.27657  | 16.55399 | 4.73E-05 | 0.010282 | SPRED3        | sprouty-related, EVH1 domain containing 3 [Source:HGNC Symbol;Acc:31041]                                                    |
| ENSG00000178860 | 2.19983 | 2.81309  | 16.50821 | 4.84E-05 | 0.010282 | MSC           | musculin [Source:HGNC Symbol;Acc:7321]                                                                                      |
| ENSG00000115641 | 2.09482 | 3.98450  | 16.54332 | 4.76E-05 | 0.010282 | FHL2          | four and a half LIM domains 2 [Source:HGNC Symbol;Acc:3703]                                                                 |
| ENSG00000165030 | 1.93433 | 5.88034  | 16.52314 | 4.81E-05 | 0.010282 | NFIL3         | nuclear factor, interleukin 3 regulated [Source:HGNC Symbol;Acc:7787]                                                       |
| ENSG00000116717 | 2.12424 | 5.65356  | 16.40922 | 5.10E-05 | 0.010411 | GADD45A       | growth arrest and DNA-damage-inducible, alpha [Source:HGNC Symbol;Acc:4095]                                                 |
| ENSG00000123610 | 2.04916 | 2.49775  | 16.42333 | 5.07E-05 | 0.010411 | TNFAIP6       | tumor necrosis factor, alpha-induced protein 6 [Source:HGNC Symbol;Acc:11898]                                               |
| ENSG00000174348 | 1.32502 | 6.34457  | 16.36734 | 5.22E-05 | 0.010508 | PODNL         | podocalyxin [Source:HGNC Symbol;Acc:23174]                                                                                  |
| ENSG00000185274 | 1.51910 | 3.12744  | 16.30938 | 5.38E-05 | 0.010697 | WBSCR17       | Williams-Beuren syndrome chromosome region 17 [Source:HGNC Symbol;Acc:16347]                                                |
| ENSG00000229644 | 3.14233 | 0.94639  | 16.24757 | 5.56E-05 | 0.010913 | NAMPTL        | nicotinamide phosphoribosyltransferase-like [Source:HGNC Symbol;Acc:17633]                                                  |
| ENSG00000124762 | 2.22944 | 6.85426  | 16.18125 | 5.76E-05 | 0.011163 | CDKN1A        | cyclin-dependent kinase inhibitor 1A (p21, Cip1) [Source:HGNC Symbol;Acc:1784]                                              |
| ENSG00000136997 | 2.40111 | 6.78395  | 16.14128 | 5.88E-05 | 0.011262 | MYC           | v-myc avian myelocytomatosis viral oncogene homolog [Source:HGNC Symbol;Acc:7553]                                           |
| ENSG00000147647 | 2.97186 | 0.77622  | 16.05677 | 6.15E-05 | 0.011634 | DPY5          | dihydropyrimidinase [Source:HGNC Symbol;Acc:3013]                                                                           |
| ENSG00000137558 | 2.91362 | 2.89473  | 15.84608 | 6.87E-05 | 0.012127 | PI15          | peptidase inhibitor 15 [Source:HGNC Symbol;Acc:8946]                                                                        |
| ENSG00000103888 | 2.08412 | 4.28584  | 15.92780 | 6.58E-05 | 0.012127 | KIAA1199      | KIAA1199 [Source:HGNC Symbol;Acc:29213]                                                                                     |
| ENSG00000057657 | 1.85009 | 5.92084  | 15.86008 | 6.82E-05 | 0.012127 | PRDM1         | PR domain containing 1, with ZNF domain [Source:HGNC Symbol;Acc:9346]                                                       |
| ENSG00000150347 | 1.26705 | 7.62913  | 15.88913 | 6.72E-05 | 0.012127 | ARID5B        | AT rich interactive domain 5B (MRF1-like) [Source:HGNC Symbol;Acc:17362]                                                    |
| ENSG00000090104 | 2.38247 | 6.19202  | 15.74658 | 7.24E-05 | 0.012519 | RGS1          | regulator of G-protein signaling 1 [Source:HGNC Symbol;Acc:9991]                                                            |
| ENSG00000187479 | 2.06247 | 6.89142  | 15.69476 | 7.44E-05 | 0.012519 | C11orf96      | chromosome 11 open reading frame 96 [Source:HGNC Symbol;Acc:38675]                                                          |
| ENSG00000124772 | 1.89584 | 2.60777  | 15.68251 | 7.49E-05 | 0.012519 | CPNVE5        | copine V [Source:HGNC Symbol;Acc:2318]                                                                                      |
| ENSG00000184588 | 1.67777 | 5.90214  | 15.74051 | 7.27E-05 | 0.012519 | PDE4B         | phosphodiesterase 4B, cAMP-specific [Source:HGNC Symbol;Acc:8781]                                                           |
| ENSG00000137573 | 1.47661 | 5.93783  | 15.70383 | 7.41E-05 | 0.012519 | SULF1         | sulfatase 1 [Source:HGNC Symbol;Acc:20391]                                                                                  |
| ENSG00000172548 | 4.22509 | 0.96997  | 15.46461 | 8.41E-05 | 0.013755 | NIPAL4        | NIPA-like domain containing 4 [Source:HGNC Symbol;Acc:28018]                                                                |
| ENSG00000122121 | 2.09503 | 1.06883  | 15.47504 | 8.36E-05 | 0.013755 | XPNPPE2       | X-prolyl aminopeptidase (aminopeptidase P) 2, membrane-bound [Source:HGNC Symbol;Acc:12823]                                 |
| ENSG00000108700 | 2.86214 | 2.02288  | 15.38336 | 8.78E-05 | 0.014066 | CCL8          | chemokine (C-C motif) ligand 8 [Source:HGNC Symbol;Acc:10635]                                                               |
| ENSG00000115009 | 3.01211 | 4.55039  | 15.27509 | 9.29E-05 | 0.014376 | CCL20         | chemokine (C-C motif) ligand 20 [Source:HGNC Symbol;Acc:10619]                                                              |
| ENSG00000106366 | 2.65137 | 7.57336  | 15.29729 | 9.18E-05 | 0.014376 | SERPINE1      | serpin peptidase inhibitor, clade E (nexin, plasminogen activator inhibitor type 1), member 1 [Source:HGNC Symbol;Acc:8583] |
| ENSG00000173276 | 1.24195 | 5.92132  | 15.18983 | 9.72E-05 | 0.014827 | ZBTB21        | zinc finger and BTB domain containing 21 [Source:HGNC Symbol;Acc:13083]                                                     |
| ENSG00000112562 | 1.62636 | 5.24320  | 15.01947 | 0.000106 | 0.015683 | SMOC2         | SPARC related modular calcium binding 2 [Source:HGNC Symbol;Acc:20323]                                                      |
| ENSG00000171560 | 3.37459 | 3.77409  | 14.96535 | 0.000110 | 0.015927 | FGA           | fibronogen alpha chain [Source:HGNC Symbol;Acc:3661]                                                                        |
| ENSG00000184956 | 6.36009 | 2.51086  | 14.88945 | 0.000114 | 0.015985 | MUC6          | mucin 6, oligomeric mucus/gel-forming [Source:HGNC Symbol;Acc:7517]                                                         |
| ENSG00000196136 | 4.56901 | 2.44816  | 14.83998 | 0.000117 | 0.015985 | SERPINA3      | serpin peptidase inhibitor, clade A (alpha-1 antitrypsin, antitrypsin), member 3 [Source:HGNC Symbol;Acc:16]                |
| ENSG00000120961 | 2.56619 | 5.18239  | 14.85226 | 0.000116 | 0.015985 | HAS2          | hyaluronan synthase 2 [Source:HGNC Symbol;Acc:4819]                                                                         |
| ENSG00000137331 | 2.29458 | 5.33819  | 14.84231 | 0.000117 | 0.015985 | IER3          | immediate early response 3 [Source:HGNC Symbol;Acc:5392]                                                                    |
| ENSG00000125148 | 2.26836 | 7.69790  | 14.87769 | 0.000115 | 0.015985 | MT2A          | metallothionein 2A [Source:HGNC Symbol;Acc:7406]                                                                            |
| ENSG00000213694 | 1.47282 | 5.17540  | 14.85354 | 0.000116 | 0.015985 | S1PR3         | sphingosine-1-phosphate receptor 3 [Source:HGNC Symbol;Acc:3167]                                                            |
| ENSG00000151917 | 2.03054 | 1.03659  | 14.80956 | 0.000119 | 0.016105 | BEND6         | BEN domain containing 6 [Source:HGNC Symbol;Acc:20871]                                                                      |
| ENSG00000272636 | 1.20679 | 4.10180  | 14.78188 | 0.000121 | 0.016126 | DOC2B         | double C2-like domains, beta [Source:HGNC Symbol;Acc:2986]                                                                  |
| ENSG00000133063 | 3.68660 | 4.12134  | 14.73074 | 0.000124 | 0.016270 | CHIT1         | chitinase 1 (chitotriosidase) [Source:HGNC Symbol;Acc:1936]                                                                 |
| ENSG00000163520 | 1.27503 | 5.44396  | 14.72640 | 0.000124 | 0.016270 | FBLN2         | fibulin 2 [Source:HGNC Symbol;Acc:3601]                                                                                     |
| ENSG00000280411 | 2.99807 | 3.58603  | 14.68427 | 0.000127 | 0.016500 | NA            | NA                                                                                                                          |
| ENSG00000171223 | 1.91345 | 8.56827  | 14.63683 | 0.000130 | 0.016501 | JUNB          | jun B proto-oncogene [Source:HGNC Symbol;Acc:6205]                                                                          |
| ENSG00000064300 | 1.79516 | 2.82751  | 14.62953 | 0.000131 | 0.016501 | NGFR          | nerve growth factor receptor [Source:HGNC Symbol;Acc:7809]                                                                  |
| ENSG00000146555 | 1.23186 | 5.26254  | 14.62289 | 0.000131 | 0.016501 | SDK1          | sidekick cell adhesion molecule 1 [Source:HGNC Symbol;Acc:19307]                                                            |
| ENSG00000110848 | 1.72638 | 4.43865  | 14.59040 | 0.000134 | 0.016655 | CD69          | CD69 molecule [Source:HGNC Symbol;Acc:1694]                                                                                 |
| ENSG00000235531 | 1.68531 | 2.65199  | 14.53392 | 0.000138 | 0.017026 | RP11-383H13.1 | Protein LOC100132891; cDNA FLJ53548 [Source:UniProtKB/TrEMBL;Acc:B72945]                                                    |
| ENSG00000275063 | 3.48237 | 2.08280  | 14.39476 | 0.000148 | 0.017773 | NA            | NA                                                                                                                          |
| ENSG00000112638 | 2.25272 | 5.34339  | 14.35501 | 0.000151 | 0.017773 | NR1D1         | nuclear receptor subfamily 1, group D, member 1 [Source:HGNC Symbol;Acc:7962]                                               |
| ENSG00000162433 | 1.46688 | 3.13489  | 14.33801 | 0.000153 | 0.017773 | AK4           | adenylate kinase 4 [Source:HGNC Symbol;Acc:363]                                                                             |
| ENSG00000101825 | 1.12546 | 6.72023  | 14.35152 | 0.000152 | 0.017773 | MXRA5         | matrix-remodelling associated 5 [Source:HGNC Symbol;Acc:7539]                                                               |
| ENSG00000178878 | 2.68363 | 6.37093  | 14.31591 | 0.000155 | 0.017851 | APOLD1        | apolipoprotein L domain containing 1 [Source:HGNC Symbol;Acc:25268]                                                         |
| ENSG00000139144 | 4.68976 | 1.89654  | 14.28209 | 0.000157 | 0.017911 | PIK3C2G       | phosphatidylinositol-4-phosphate 3-kinase, catalytic subunit type 2 gamma [Source:HGNC Symbol;Acc:8973]                     |
| ENSG00000218336 | 1.95895 | 3.50527  | 14.28808 | 0.000157 | 0.017911 | TENM3         | teneurin transmembrane protein 3 [Source:HGNC Symbol;Acc:29944]                                                             |
| ENSG00000049323 | 0.78373 | 6.80279  | 14.11069 | 0.000172 | 0.018933 | LTPB1         | latent transforming growth factor beta binding protein 1 [Source:HGNC Symbol;Acc:6714]                                      |
| ENSG00000086544 | 1.96489 | 5.86051  | 13.95427 | 0.000187 | 0.020016 | ITPKC         | inositol-trisphosphate 3-kinase C [Source:HGNC Symbol;Acc:14897]                                                            |
| ENSG00000146072 | 1.20716 | 5.99932  | 13.8     |          |          |               |                                                                                                                             |

DE mRNA comb FDR 0.05 up

| Ensembl gene    | logFC   | logCPM   | LR       | PValue   | adj.p    | gene          | Description                                                                                                                         |
|-----------------|---------|----------|----------|----------|----------|---------------|-------------------------------------------------------------------------------------------------------------------------------------|
| ENSG00000119699 | 1.32857 | 4.40318  | 13.49076 | 0.000240 | 0.022484 | TGFB3         | transforming growth factor, beta 3 [Source:HGNC Symbol;Acc:11769]                                                                   |
| ENSG00000166147 | 1.03778 | 7.23359  | 13.50449 | 0.000238 | 0.022484 | FBN1          | fibrillin 1 [Source:HGNC Symbol;Acc:3603]                                                                                           |
| ENSG00000270607 | 3.17813 | 0.49564  | 13.43923 | 0.000246 | 0.022504 | RP11-359E10.1 |                                                                                                                                     |
| ENSG00000196611 | 4.38243 | 2.27941  | 13.41045 | 0.000250 | 0.022589 | MMP1          | matrix metalloproteinase 1 (interstitial collagenase) [Source:HGNC Symbol;Acc:7155]                                                 |
| ENSG00000111912 | 1.48623 | 7.97399  | 13.41714 | 0.000249 | 0.022589 | NCOA7         | nuclear receptor coactivator 7 [Source:HGNC Symbol;Acc:21081]                                                                       |
| ENSG00000163599 | 1.79729 | 1.77830  | 13.35767 | 0.000257 | 0.022924 | CTLA4         | cytotoxic T-lymphocyte-associated protein 4 [Source:HGNC Symbol;Acc:2505]                                                           |
| ENSG00000112096 | 1.27700 | 9.12382  | 13.34026 | 0.000260 | 0.022924 | SOD2          | superoxide dismutase 2, mitochondrial [Source:HGNC Symbol;Acc:11180]                                                                |
| ENSG00000148841 | 1.22682 | 6.40856  | 13.25126 | 0.000272 | 0.023886 | ITPRIP        | inositol 1,4,5-trisphosphate receptor interacting protein [Source:HGNC Symbol;Acc:29370]                                            |
| ENSG00000160862 | 2.48352 | 1.99589  | 13.22681 | 0.000276 | 0.023950 | AZGP1         | alpha-2-glycoprotein 1, zinc-binding [Source:HGNC Symbol;Acc:910]                                                                   |
| ENSG00000178607 | 1.22929 | 5.68529  | 13.20652 | 0.000279 | 0.024078 | ERN1          | endoplasmic reticulum to nucleus signaling 1 [Source:HGNC Symbol;Acc:3449]                                                          |
| ENSG00000221866 | 1.23108 | 3.52335  | 13.18700 | 0.000282 | 0.024107 | PLXNA4        | plexin A4 [Source:HGNC Symbol;Acc:9102]                                                                                             |
| ENSG00000054598 | 1.93191 | 4.98813  | 13.16565 | 0.000285 | 0.024210 | FOXC1         | forkhead box C1 [Source:HGNC Symbol;Acc:3800]                                                                                       |
| ENSG00000168421 | 1.41515 | 3.20004  | 13.11782 | 0.000292 | 0.024570 | RHOH          | ras homolog family member H [Source:HGNC Symbol;Acc:686]                                                                            |
| ENSG00000128342 | 2.84416 | 5.41639  | 13.00533 | 0.000311 | 0.025815 | LIF           | leukemia inhibitory factor [Source:HGNC Symbol;Acc:6596]                                                                            |
| ENSG00000140511 | 1.42217 | 3.02868  | 12.91578 | 0.000326 | 0.026937 | HAPLN3        | hyaluronan and proteoglycan link protein 3 [Source:HGNC Symbol;Acc:21446]                                                           |
| ENSG00000171724 | 2.20078 | 1.03051  | 12.89711 | 0.000329 | 0.026946 | VAT1L         | vesicle amine transport 1-like [Source:HGNC Symbol;Acc:29315]                                                                       |
| ENSG00000144655 | 1.82448 | 6.65370  | 12.89556 | 0.000329 | 0.026946 | CSRNP1        | cysteine-serine-rich nuclear protein 1 [Source:HGNC Symbol;Acc:14300]                                                               |
| ENSG00000077274 | 2.03654 | 1.45591  | 12.87628 | 0.000333 | 0.027084 | CAPN6         | calpain 6 [Source:HGNC Symbol;Acc:1483]                                                                                             |
| ENSG00000053702 | 1.82759 | 1.14100  | 12.85212 | 0.000337 | 0.027294 | NRIP2         | nuclear receptor interacting protein 2 [Source:HGNC Symbol;Acc:23078]                                                               |
| ENSG00000115461 | 1.00860 | 8.61729  | 12.82946 | 0.000341 | 0.027485 | IGFBP5        | insulin-like growth factor binding protein 5 [Source:HGNC Symbol;Acc:5474]                                                          |
| ENSG00000134460 | 1.89714 | 2.94855  | 12.71156 | 0.000363 | 0.028994 | IL2RA         | interleukin 2 receptor, alpha [Source:HGNC Symbol;Acc:6008]                                                                         |
| ENSG00000155380 | 1.25733 | 3.57673  | 12.71044 | 0.000364 | 0.028994 | SLC16A1       | solute carrier family 16 (monocarboxylate transporter), member 1 [Source:HGNC Symbol;Acc:10922]                                     |
| ENSG00000154734 | 2.06860 | 7.71059  | 12.67945 | 0.000370 | 0.029217 | ADAMTSL1      | ADAM metalloproteinase with thrombospondin type 1 motif, 1 [Source:HGNC Symbol;Acc:217]                                             |
| ENSG00000169071 | 1.56928 | 2.98386  | 12.67603 | 0.000370 | 0.029217 | ROR2          | receptor tyrosine kinase-like orphan receptor 2 [Source:HGNC Symbol;Acc:10257]                                                      |
| ENSG00000116132 | 1.20866 | 6.14234  | 12.66784 | 0.000372 | 0.029217 | PRRX1         | paired related homeobox 1 [Source:HGNC Symbol;Acc:9142]                                                                             |
| ENSG00000134531 | 1.74395 | 8.88782  | 12.57079 | 0.000392 | 0.030319 | EMP1          | epithelial membrane protein 1 [Source:HGNC Symbol;Acc:3333]                                                                         |
| ENSG00000167034 | 2.44955 | 3.55456  | 12.52535 | 0.000401 | 0.030726 | NKX3-1        | NK3 homeobox 1 [Source:HGNC Symbol;Acc:7838]                                                                                        |
| ENSG00000128016 | 2.10952 | 10.17545 | 12.50289 | 0.000406 | 0.030726 | ZFP36         | ZFP36 ring finger protein [Source:HGNC Symbol;Acc:12862]                                                                            |
| ENSG00000275894 | 2.05303 | 0.90055  | 12.52609 | 0.000401 | 0.030726 | NA            |                                                                                                                                     |
| ENSG00000174705 | 1.03119 | 5.52508  | 12.50042 | 0.000407 | 0.030726 | SH3PXD2B      | SH3 and PX domains 2B [Source:HGNC Symbol;Acc:29242]                                                                                |
| ENSG00000176678 | 1.67042 | 1.57214  | 12.46577 | 0.000414 | 0.031003 | FOXJ1         | forkhead box L1 [Source:HGNC Symbol;Acc:3817]                                                                                       |
| ENSG00000158050 | 1.86748 | 2.97524  | 12.41110 | 0.000427 | 0.031595 | DUSP2         | dual specificity phosphatase 2 [Source:HGNC Symbol;Acc:3068]                                                                        |
| ENSG00000124466 | 1.78893 | 1.29060  | 12.41961 | 0.000425 | 0.031595 | LYPD3         | LY6/PLAUR domain containing 3 [Source:HGNC Symbol;Acc:24880]                                                                        |
| ENSG00000221869 | 1.23158 | 7.62104  | 12.37821 | 0.000434 | 0.031884 | CEBPD         | CCAAT/enhancer binding protein (C/EBP), delta [Source:HGNC Symbol;Acc:1835]                                                         |
| ENSG00000125813 | 0.93546 | 4.22265  | 12.32791 | 0.000446 | 0.032333 | RUNX2         | runt-related transcription factor 2 [Source:HGNC Symbol;Acc:10472]                                                                  |
| ENSG00000115594 | 1.05719 | 8.71549  | 12.29443 | 0.000454 | 0.032735 | IL1R1         | interleukin 1 receptor, type I [Source:HGNC Symbol;Acc:5993]                                                                        |
| ENSG00000252372 | 1.49333 | 4.73142  | 12.28460 | 0.000457 | 0.032758 | CCDC71L       | coiled-coil domain containing 71-like [Source:HGNC Symbol;Acc:26685]                                                                |
| ENSG00000164318 | 1.58950 | 2.16823  | 12.22226 | 0.000472 | 0.033497 | EGFLAM        | EGF-like, fibronectin type III and laminin G domains [Source:HGNC Symbol;Acc:26810]                                                 |
| ENSG00000168334 | 3.92335 | 1.99704  | 12.10458 | 0.000503 | 0.034931 | XIRP1         | xin actin-binding repeat containing 1 [Source:HGNC Symbol;Acc:14301]                                                                |
| ENSG00000152377 | 1.93420 | 2.83709  | 12.09787 | 0.000505 | 0.034931 | SPOCK1        | sparc/osteonectin, cwcv and kazal-like domains proteoglycan (testican) 1 [Source:HGNC Symbol;Acc:11251]                             |
| ENSG00000196843 | 1.52085 | 5.73321  | 12.06792 | 0.000513 | 0.035193 | ARID5A        | AT rich interactive domain 5A (MRF1-like) [Source:HGNC Symbol;Acc:17361]                                                            |
| ENSG00000151892 | 1.11246 | 5.01076  | 12.06759 | 0.000513 | 0.035193 | GFRA1         | GDNF family receptor alpha 1 [Source:HGNC Symbol;Acc:4243]                                                                          |
| ENSG00000075426 | 1.75485 | 8.25525  | 12.04064 | 0.000521 | 0.035550 | FOSL2         | FOS-like antigen 2 [Source:HGNC Symbol;Acc:3798]                                                                                    |
| ENSG00000123500 | 2.86865 | 2.41021  | 11.99261 | 0.000534 | 0.036008 | COL10A1       | collagen, type X, alpha 1 [Source:HGNC Symbol;Acc:2185]                                                                             |
| ENSG00000134443 | 4.24415 | 7.44585  | 11.95381 | 0.000545 | 0.036609 | GRP           | gastrin-releasing peptide [Source:HGNC Symbol;Acc:4605]                                                                             |
| ENSG00000145623 | 1.02575 | 7.46487  | 11.90923 | 0.000559 | 0.036913 | OSMR          | oncostatin M receptor [Source:HGNC Symbol;Acc:8507]                                                                                 |
| ENSG00000054803 | 3.66741 | 0.69675  | 11.88490 | 0.000566 | 0.037194 | CBLN4         | cerebellin 4 precursor [Source:HGNC Symbol;Acc:16231]                                                                               |
| ENSG00000184731 | 1.18518 | 3.61468  | 11.86351 | 0.000572 | 0.037397 | FAM110C       | family with sequence similarity 110, member C [Source:HGNC Symbol;Acc:33340]                                                        |
| ENSG00000106809 | 1.32990 | 5.76436  | 11.84844 | 0.000577 | 0.037459 | OGN           | osteolectin [Source:HGNC Symbol;Acc:8126]                                                                                           |
| ENSG00000151012 | 1.39101 | 2.97448  | 11.77545 | 0.000600 | 0.038637 | SLC7A11       | solute carrier family 7 (anionic amino acid transporter light chain, xc- system), member 11 [Source:HGNC Symbol;Acc:11059]          |
| ENSG00000251348 | 2.80365 | 0.41699  | 11.73969 | 0.000612 | 0.038833 | HSPD1P11      | heat shock 60kDa protein 1 (chaperonin) pseudogene 11 [Source:HGNC Symbol;Acc:35142]                                                |
| ENSG00000138135 | 2.53026 | 4.01963  | 11.71588 | 0.000620 | 0.038833 | CH25H         | cholesterol 25-hydroxylase [Source:HGNC Symbol;Acc:1907]                                                                            |
| ENSG00000135069 | 2.25434 | 1.11560  | 11.71339 | 0.000621 | 0.038833 | PSAT1         | phosphoserine aminotransferase 1 [Source:HGNC Symbol;Acc:19129]                                                                     |
| ENSG00000171621 | 1.99337 | 6.00924  | 11.71662 | 0.000619 | 0.038833 | SPSB1         | splA/ryanodine receptor domain and SOCS box containing 1 [Source:HGNC Symbol;Acc:30628]                                             |
| ENSG00000273604 | 1.96251 | 1.88698  | 11.68570 | 0.000630 | 0.039104 | NA            |                                                                                                                                     |
| ENSG00000148948 | 1.75336 | 2.17366  | 11.67399 | 0.000634 | 0.039196 | LRRC4C        | leucine rich repeat containing 4C [Source:HGNC Symbol;Acc:29317]                                                                    |
| ENSG00000131873 | 1.31607 | 6.42325  | 11.61578 | 0.000654 | 0.040283 | CHSY1         | chondroitin sulfate synthase 1 [Source:HGNC Symbol;Acc:17198]                                                                       |
| ENSG00000205420 | 7.34982 | 2.54470  | 11.56142 | 0.000673 | 0.040399 | KRT6A         | keratin 6A [Source:HGNC Symbol;Acc:6443]                                                                                            |
| ENSG00000163874 | 2.44096 | 5.86879  | 11.55104 | 0.000677 | 0.040399 | ZC3H12A       | zinc finger CCCH-type containing 12A [Source:HGNC Symbol;Acc:26259]                                                                 |
| ENSG00000172724 | 1.95397 | 3.29850  | 11.55921 | 0.000674 | 0.040399 | CCL19         | chemokine (C-C motif) ligand 19 [Source:HGNC Symbol;Acc:10617]                                                                      |
| ENSG00000148339 | 1.78313 | 5.60394  | 11.54750 | 0.000678 | 0.040399 | SLC25A25      | solute carrier family 25 (mitochondrial carrier; phosphate carrier), member 25 [Source:HGNC Symbol;Acc:20663]                       |
| ENSG00000121966 | 1.58279 | 5.87810  | 11.58527 | 0.000665 | 0.040399 | CXCR4         | chemokine (C-X-C motif) receptor 4 [Source:HGNC Symbol;Acc:2561]                                                                    |
| ENSG00000065911 | 1.54419 | 4.71333  | 11.54593 | 0.000679 | 0.040399 | MTHFD2        | methylenetetrahydrofolate dehydrogenase (NADP+ dependent) 2, methylenetetrahydrofolate cyclohydrolase [Source:HGNC Symbol;Acc:7434] |
| ENSG00000138061 | 1.47860 | 6.16185  | 11.58066 | 0.000666 | 0.040399 | CYP1B1        | cytochrome P450, family 1, subfamily B, polypeptide 1 [Source:HGNC Symbol;Acc:2597]                                                 |
| ENSG00000110680 | 4.93078 | 3.99998  | 11.44553 | 0.000717 | 0.042321 | CALCA         | calcitonin-related polypeptide alpha [Source:HGNC Symbol;Acc:1437]                                                                  |
| ENSG00000131459 | 2.34992 | 4.56906  | 11.40761 | 0.000731 | 0.043032 | GFPT2         | glutamine-fructose-6-phosphate transaminase 2 [Source:HGNC Symbol;Acc:4242]                                                         |
| ENSG00000165507 | 1.77846 | 8.53285  | 11.32512 | 0.000765 | 0.044322 | C10orf10      | chromosome 10 open reading frame 10 [Source:HGNC Symbol;Acc:23355]                                                                  |
| ENSG00000205362 | 2.81773 | 3.77660  | 11.30580 | 0.000773 | 0.044402 | MT1A          | metallothionein 1A [Source:HGNC Symbol;Acc:7393]                                                                                    |
| ENSG00000131711 | 1.51644 | 7.27115  | 11.30133 | 0.000775 | 0.044402 | MAP1B         | microtubule-associated protein 1B [Source:HGNC Symbol;Acc:6836]                                                                     |
| ENSG00000172817 | 1.10464 | 2.94335  | 11.30361 | 0.000774 | 0.044402 | CYP7B1        | cytochrome P450, family 7, subfamily B, polypeptide 1 [Source:HGNC Symbol;Acc:2652]                                                 |
| ENSG00000169508 | 1.84737 | 5.00255  | 11.27908 | 0.000784 | 0.044611 | GPR183        | G protein-coupled receptor 183 [Source:HGNC Symbol;Acc:3128]                                                                        |
| ENSG00000145362 | 1.80290 | 6.14064  | 11.28035 | 0.000783 | 0.044611 | ANK2          | ankyrin 2, neuronal [Source:HGNC Symbol;Acc:493]                                                                                    |
| ENSG00000130037 | 1.37375 | 2.29699  | 11.25152 | 0.000796 | 0.044933 | KCNAB5        | potassium voltage-gated channel, shaker-related subfamily, member 5 [Source:HGNC Symbol;Acc:6224]                                   |
| ENSG00000080856 | 2.25382 | 2.62906  | 11.23221 | 0.000804 | 0.044989 | SYN1          | synapsin I [Source:HGNC Symbol;Acc:11494]                                                                                           |
| ENSG00000230673 | 1.72959 | 0.81842  | 11.17879 | 0.000827 | 0.045550 | PABPC1P3      | poly(A) binding protein, cytoplasmic 1 pseudogene 3 [Source:HGNC Symbol;Acc:8560]                                                   |
| ENSG00000069399 | 1.61388 | 6.27719  | 11.17440 | 0.000829 | 0.045550 | BCL3          | B-cell CLL/lymphoma 3 [Source:HGNC Symbol;Acc:998]                                                                                  |
| ENSG00000162924 | 1.47150 | 6.37958  | 11.14608 | 0.000842 | 0.045572 | REL           | v-rel avian reticuloendotheliosis viral oncogene homolog [Source:HGNC Symbol;Acc:9954]                                              |
| ENSG00000140285 | 1.46996 | 6.31497  | 11.16497 | 0.000834 | 0.045572 | FGF7          | fibroblast growth factor 7 [Source:HGNC Symbol;Acc:3685]                                                                            |
| ENSG00000149256 | 1.41991 | 3.35110  | 11.10063 | 0.000863 | 0.046415 | TENM4         | teneurin transmembrane protein 4 [Source:HGNC Symbol;Acc:29945]                                                                     |
| ENSG00000167470 | 1.32106 | 7.60879  | 11.09466 | 0.000866 | 0.046415 | MIDN          | midline 1 [Source:HGNC Symbol;Acc:16298]                                                                                            |
| ENSG00000118985 | 1.39741 | 7.04448  | 11.08594 | 0.000870 | 0.046475 | ELL2          | elongation factor, RNA polymerase II, 2 [Source:HGNC Symbol;Acc:17064]                                                              |
| ENSG00000091879 | 1.16733 | 4.58683  | 11.07830 | 0.000873 | 0.046508 | ANGPT2        | angiopoietin 2 [Source:HGNC Symbol;Acc:485]                                                                                         |
| ENSG0000003987  | 2.30834 | 2.60351  | 11.05775 | 0.000883 | 0.046623 | MTMR7         | myotubularin related protein 7 [Source:HGNC Symbol;Acc:7454]                                                                        |
| ENSG00000161960 | 1.94774 | 1.95922  | 11.04448 | 0.000890 | 0.046623 | EIF4A1        | eukaryotic translation initiation factor 4A1 [Source:HGNC Symbol;Acc:3282]                                                          |
| ENSG00000222041 | 1.51426 | 3.76558  | 11.04257 | 0.000890 | 0.046623 | LINC00152     | long intergenic non-protein coding RNA 152 [Source:HGNC Symbol;Acc:28717]                                                           |
| ENSG00000205364 | 2.65191 | 4.49950  | 11.00429 | 0.000909 | 0.046890 | MT1M          | metallothionein 1M [Source:HGNC Symbol;Acc:14296]                                                                                   |
| ENSG00000167941 | 2.48993 | 0.66407  | 10.97790 | 0.000922 | 0.046890 | SOST          | sclerostin [Source:HGNC Symbol;Acc:13771]                                                                                           |
| ENSG00000205502 | 2.36492 | 3.48337  | 11.00445 | 0.000909 | 0.046890 | C2CD4B        | C2 calcium-dependent domain containing 4B [Source:HGNC Symbol;Acc:33628]                                                            |
| ENSG00000081041 | 2.30551 | 6.75988  | 10.96524 | 0.000928 | 0.046890 | CXCL2         | chemokine (C-X-C motif) ligand 2 [Source:HGNC Symbol;Acc:4603]                                                                      |
| ENSG00000211950 | 2.17215 | 3.00643  | 10.97162 | 0.000925 | 0.046890 | IGHV1-24      | immunoglobulin heavy variable 1-24 [Source:HGNC Symbol;Acc:5551]                                                                    |
| ENSG00000109265 | 1.38957 | 2.59990  | 10.96968 | 0.000926 | 0.046890 | KIAA1211      | KIAA1211 [Source:HGNC Symbol;Acc:29219]                                                                                             |
| ENSG00000277632 | 2.38488 | 2.55016  | 10.95053 | 0.000936 | 0.046895 | NA            |                                                                                                                                     |
| ENSG00000188257 |         |          |          |          |          |               |                                                                                                                                     |

## DE mRNA comb FDR 0.05 down

| Ensembl gene    | logFC    | logCPM  | LR       | PValue   | adj.p    | gene          | Description                                                                                                       |
|-----------------|----------|---------|----------|----------|----------|---------------|-------------------------------------------------------------------------------------------------------------------|
| ENSG00000231322 | -3.07431 | 3.23551 | 58.28354 | 2.27E-14 | 3.56E-10 | RPL13AP17     | ribosomal protein L13a pseudogene 17 [Source:HGNC Symbol;Acc:36167]                                               |
| ENSG00000186188 | -2.65953 | 2.87334 | 34.69453 | 3.86E-09 | 3.03E-05 | FFAR4         | free fatty acid receptor 4 [Source:HGNC Symbol;Acc:19061]                                                         |
| ENSG00000183019 | -2.13544 | 3.96816 | 27.04545 | 1.99E-07 | 0.000446 | C19orf59      | chromosome 19 open reading frame 59 [Source:HGNC Symbol;Acc:27291]                                                |
| ENSG00000280099 | -1.74596 | 3.04767 | 25.62358 | 4.15E-07 | 0.000661 | NA            | NA                                                                                                                |
| ENSG00000227502 | -2.11205 | 1.95524 | 24.52990 | 7.32E-07 | 0.000958 | RP1-249H1.4   |                                                                                                                   |
| ENSG00000205086 | -2.60799 | 1.56772 | 23.75222 | 1.10E-06 | 0.001229 | C2orf91       | chromosome 2 open reading frame 91 [Source:HGNC Symbol;Acc:42966]                                                 |
| ENSG00000165490 | -1.74827 | 1.98199 | 22.73104 | 1.86E-06 | 0.001829 | C11orf82      | chromosome 11 open reading frame 82 [Source:HGNC Symbol;Acc:26351]                                                |
| ENSG00000177494 | -1.97682 | 3.27748 | 21.76961 | 3.07E-06 | 0.002761 | ZBED2         | zinc finger, BED-type containing 2 [Source:HGNC Symbol;Acc:20710]                                                 |
| ENSG00000279312 | -1.89422 | 3.25250 | 21.19005 | 4.16E-06 | 0.003439 | NA            | NA                                                                                                                |
| ENSG00000111863 | -1.83930 | 3.23586 | 20.86834 | 4.92E-06 | 0.003864 | ADTRP         | androgen-dependent TFPI-regulating protein [Source:HGNC Symbol;Acc:21214]                                         |
| ENSG00000102886 | -1.89367 | 1.33559 | 19.13650 | 1.22E-05 | 0.006178 | GDPD3         | glycerophosphodiester phosphodiesterase domain containing 3 [Source:HGNC Symbol;Acc:28638]                        |
| ENSG00000273877 | -1.73812 | 1.45175 | 18.83734 | 1.42E-05 | 0.006178 | NA            | NA                                                                                                                |
| ENSG00000233836 | -1.24166 | 3.05035 | 19.08904 | 1.25E-05 | 0.006178 | RP11-255H23.2 |                                                                                                                   |
| ENSG00000168661 | -1.50084 | 1.53976 | 18.26336 | 1.92E-05 | 0.007554 | ZNF30         | zinc finger protein 30 [Source:HGNC Symbol;Acc:13090]                                                             |
| ENSG00000165140 | -1.41840 | 6.79165 | 17.72047 | 2.56E-05 | 0.008551 | FBP1          | fructose-1,6-bisphosphatase 1 [Source:HGNC Symbol;Acc:3606]                                                       |
| ENSG00000197933 | -1.40929 | 1.98489 | 17.67734 | 2.62E-05 | 0.008565 | ZNF823        | zinc finger protein 823 [Source:HGNC Symbol;Acc:30936]                                                            |
| ENSG00000267530 | -1.78582 | 2.05237 | 17.46581 | 2.93E-05 | 0.008951 | AC006273.5    |                                                                                                                   |
| ENSG00000109084 | -1.12343 | 4.54093 | 17.26167 | 3.26E-05 | 0.009302 | TMEM97        | transmembrane protein 97 [Source:HGNC Symbol;Acc:28106]                                                           |
| ENSG00000101280 | -2.35348 | 2.19223 | 16.52967 | 4.79E-05 | 0.010282 | ANGPT4        | angiopoietin 4 [Source:HGNC Symbol;Acc:487]                                                                       |
| ENSG00000166928 | -2.00636 | 4.29593 | 16.66520 | 4.46E-05 | 0.010282 | MS4A14        | membrane-spanning 4-domains, subfamily A, member 14 [Source:HGNC Symbol;Acc:30706]                                |
| ENSG00000154309 | -1.55690 | 4.98686 | 16.68774 | 4.41E-05 | 0.010282 | DISP1         | dispatched homolog 1 (Drosophila) [Source:HGNC Symbol;Acc:19711]                                                  |
| ENSG00000186074 | -1.47624 | 4.09755 | 16.61976 | 4.57E-05 | 0.010282 | CD300LF       | CD300 molecule-like family member f [Source:HGNC Symbol;Acc:29883]                                                |
| ENSG00000144285 | -1.30572 | 3.92562 | 16.68210 | 4.42E-05 | 0.010282 | SCN1A         | sodium channel, voltage-gated, type I, alpha subunit [Source:HGNC Symbol;Acc:10585]                               |
| ENSG00000197471 | -1.28156 | 6.32352 | 16.51354 | 4.83E-05 | 0.010282 | SPN           | sialophorin [Source:HGNC Symbol;Acc:11249]                                                                        |
| ENSG00000055732 | -1.10872 | 3.95160 | 16.57976 | 4.66E-05 | 0.010282 | MCOLN3        | mucopolin 3 [Source:HGNC Symbol;Acc:13358]                                                                        |
| ENSG00000182010 | -1.56050 | 8.02949 | 16.47161 | 4.94E-05 | 0.010343 | RTKN2         | rhotekin 2 [Source:HGNC Symbol;Acc:19364]                                                                         |
| ENSG00000134216 | -1.68643 | 2.64706 | 15.93909 | 6.54E-05 | 0.012127 | CHIA          | chitinase, acidic [Source:HGNC Symbol;Acc:17432]                                                                  |
| ENSG00000163154 | -1.63822 | 1.79222 | 15.87453 | 6.77E-05 | 0.012127 | TNFAIP8L2     | tumor necrosis factor, alpha-induced protein 8-like 2 [Source:HGNC Symbol;Acc:26277]                              |
| ENSG00000038945 | -1.54726 | 7.30109 | 15.41974 | 8.61E-05 | 0.013940 | MSR1          | macrophage scavenger receptor 1 [Source:HGNC Symbol;Acc:7376]                                                     |
| ENSG00000279289 | -1.53363 | 2.18354 | 15.26661 | 9.34E-05 | 0.014376 | NA            | NA                                                                                                                |
| ENSG00000196268 | -1.04599 | 4.72817 | 15.30275 | 9.16E-05 | 0.014376 | ZNF493        | zinc finger protein 493 [Source:HGNC Symbol;Acc:23708]                                                            |
| ENSG00000206557 | -2.53617 | 2.02738 | 15.01206 | 0.000107 | 0.015683 | TRIM71        | tripartite motif containing 71, E3 ubiquitin protein ligase [Source:HGNC Symbol;Acc:32669]                        |
| ENSG00000224215 | -1.97496 | 1.67573 | 15.02507 | 0.000106 | 0.015683 | RP11-371A19.2 |                                                                                                                   |
| ENSG00000184635 | -1.29200 | 1.84297 | 15.04015 | 0.000105 | 0.015683 | ZNF93         | zinc finger protein 93 [Source:HGNC Symbol;Acc:13169]                                                             |
| ENSG00000261786 | -1.43300 | 3.03675 | 14.84921 | 0.000116 | 0.015985 | RP4-555D20.2  |                                                                                                                   |
| ENSG00000167588 | -1.70160 | 4.36066 | 14.77489 | 0.000121 | 0.016126 | GPD1          | glycerol-3-phosphate dehydrogenase 1 (soluble) [Source:HGNC Symbol;Acc:4455]                                      |
| ENSG00000268518 | -2.00011 | 0.60830 | 14.65128 | 0.000129 | 0.016501 | CTD-2545M3.8  |                                                                                                                   |
| ENSG00000187808 | -2.07373 | 0.82422 | 14.48452 | 0.000141 | 0.017342 | SOWAHD        | sonodowah ankyrin repeat domain family member D [Source:HGNC Symbol;Acc:32960]                                    |
| ENSG00000143167 | -2.44864 | 3.02947 | 14.43688 | 0.000145 | 0.017648 | GPA33         | glycoprotein A33 (transmembrane) [Source:HGNC Symbol;Acc:4445]                                                    |
| ENSG00000185614 | -1.86753 | 0.62686 | 14.34695 | 0.000152 | 0.017773 | FAM212A       | family with sequence similarity 212, member A [Source:HGNC Symbol;Acc:32480]                                      |
| ENSG00000155465 | -1.12167 | 4.92244 | 14.33824 | 0.000153 | 0.017773 | SLC7A7        | solute carrier family 7 (amino acid transporter light chain, y-L system), member 7 [Source:HGNC Symbol;Acc:11065] |
| ENSG00000279425 | -1.59897 | 1.49439 | 14.26448 | 0.000159 | 0.017949 | NA            | NA                                                                                                                |
| ENSG00000019169 | -1.73063 | 7.78359 | 14.22603 | 0.000162 | 0.018189 | MARCO         | macrophage receptor with collagenous structure [Source:HGNC Symbol;Acc:6895]                                      |
| ENSG00000233038 | -1.51340 | 1.97987 | 14.20414 | 0.000164 | 0.018271 | AC011899.9    |                                                                                                                   |
| ENSG00000143365 | -1.50999 | 3.41918 | 14.11790 | 0.000172 | 0.018933 | RORC          | RAR-related orphan receptor C [Source:HGNC Symbol;Acc:10260]                                                      |
| ENSG00000133246 | -1.51073 | 4.02600 | 14.03662 | 0.000179 | 0.019557 | PRAM1         | PML-RARA regulated adaptor molecule 1 [Source:HGNC Symbol;Acc:30091]                                              |
| ENSG00000183647 | -1.38241 | 1.20807 | 14.01903 | 0.000181 | 0.019605 | ZNF530        | zinc finger protein 530 [Source:HGNC Symbol;Acc:29297]                                                            |
| ENSG00000164120 | -1.32211 | 6.84085 | 13.97325 | 0.000185 | 0.019950 | HPGD          | hydroxyprostaglandin dehydrogenase 15-(NAD) [Source:HGNC Symbol;Acc:5154]                                         |
| ENSG00000170909 | -1.54860 | 4.04146 | 13.87146 | 0.000196 | 0.020776 | OSCAR         | osteoclast associated, immunoglobulin-like receptor [Source:HGNC Symbol;Acc:29960]                                |
| ENSG00000279518 | -1.77727 | 1.75584 | 13.79118 | 0.000204 | 0.021079 | NA            | NA                                                                                                                |
| ENSG00000198574 | -1.38575 | 1.31642 | 13.82165 | 0.000201 | 0.021079 | SH2D1B        | SH2 domain containing 1B [Source:HGNC Symbol;Acc:30416]                                                           |
| ENSG00000143355 | -2.54493 | 2.06730 | 13.72690 | 0.000211 | 0.021151 | LHX9          | LIM homeobox 9 [Source:HGNC Symbol;Acc:14222]                                                                     |
| ENSG00000139292 | -1.61875 | 1.64914 | 13.65609 | 0.000220 | 0.021688 | LGR5          | leucine-rich repeat containing G protein-coupled receptor 5 [Source:HGNC Symbol;Acc:4504]                         |
| ENSG00000197044 | -1.06663 | 3.96501 | 13.57234 | 0.000230 | 0.022267 | ZNF441        | zinc finger protein 441 [Source:HGNC Symbol;Acc:20875]                                                            |
| ENSG00000159640 | -1.26635 | 5.80508 | 13.50399 | 0.000238 | 0.022484 | ACE           | angiotensin I converting enzyme [Source:HGNC Symbol;Acc:2707]                                                     |
| ENSG00000186326 | -1.90941 | 0.34521 | 13.44008 | 0.000246 | 0.022504 | RGS9BP        | regulator of G protein signaling 9 binding protein [Source:HGNC Symbol;Acc:30304]                                 |
| ENSG00000166347 | -1.07042 | 7.35009 | 13.34534 | 0.000259 | 0.022924 | CYB5A         | cytochrome b5 type A (microsomal) [Source:HGNC Symbol;Acc:2570]                                                   |
| ENSG00000136352 | -1.06764 | 6.89094 | 13.37088 | 0.000256 | 0.022924 | NKX2-1        | NK2 homeobox 1 [Source:HGNC Symbol;Acc:11825]                                                                     |
| ENSG00000162704 | -0.71457 | 7.06887 | 13.24224 | 0.000274 | 0.023886 | ARPC5         | actin related protein 2/3 complex, subunit 5, 16kDa [Source:HGNC Symbol;Acc:708]                                  |
| ENSG00000169442 | -1.19106 | 6.22658 | 13.18378 | 0.000282 | 0.024107 | CD52          | CD52 molecule [Source:HGNC Symbol;Acc:1804]                                                                       |
| ENSG00000196154 | -1.14745 | 7.16932 | 13.14696 | 0.000288 | 0.024321 | S100A4        | S100 calcium binding protein A4 [Source:HGNC Symbol;Acc:10494]                                                    |
| ENSG00000137819 | -1.00375 | 4.17572 | 13.07666 | 0.000299 | 0.024982 | PQA95         | progesterin and adipoQ receptor family member V [Source:HGNC Symbol;Acc:29645]                                    |
| ENSG00000104880 | -1.40721 | 1.25702 | 12.64312 | 0.000377 | 0.029458 | ARHGAP18      | Rho/Rac guanine nucleotide exchange factor (GEF) 18 [Source:HGNC Symbol;Acc:17090]                                |
| ENSG00000236333 | -1.44039 | 1.78336 | 12.59270 | 0.000387 | 0.030114 | TRHDE-AS1     | TRHDE antisense RNA 1 [Source:HGNC Symbol;Acc:27471]                                                              |
| ENSG00000140600 | -1.54488 | 1.76138 | 12.51154 | 0.000404 | 0.030726 | SH3GL3        | SH3-domain GRB2-like 3 [Source:HGNC Symbol;Acc:10832]                                                             |
| ENSG00000164048 | -1.29416 | 4.41419 | 12.48971 | 0.000409 | 0.030755 | ZNF589        | zinc finger protein 589 [Source:HGNC Symbol;Acc:16747]                                                            |
| ENSG00000091106 | -1.67865 | 2.83262 | 12.40395 | 0.000428 | 0.031595 | NLRCA         | NLR family, CARD domain containing 4 [Source:HGNC Symbol;Acc:16412]                                               |
| ENSG00000170396 | -1.47702 | 1.28848 | 12.35579 | 0.000440 | 0.032119 | ZNF804A       | zinc finger protein 804A [Source:HGNC Symbol;Acc:21711]                                                           |
| ENSG00000324444 | -1.06178 | 5.32809 | 12.32612 | 0.000447 | 0.032333 | PNPLA6        | pataatin-like phospholipase domain containing 6 [Source:HGNC Symbol;Acc:16268]                                    |
| ENSG00000134962 | -1.41792 | 2.66826 | 12.22001 | 0.000473 | 0.033497 | KLB           | klotho beta [Source:HGNC Symbol;Acc:15527]                                                                        |
| ENSG00000086300 | -1.19473 | 5.37061 | 12.21757 | 0.000473 | 0.033497 | SNX10         | sorting nexin 10 [Source:HGNC Symbol;Acc:14974]                                                                   |
| ENSG00000261685 | -1.23402 | 4.80874 | 12.19197 | 0.000480 | 0.033808 | RP11-401P9.4  |                                                                                                                   |
| ENSG00000135929 | -1.05054 | 6.17623 | 12.18220 | 0.000482 | 0.033834 | CYP27A1       | cytochrome P450, family 27, subfamily A, polypeptide 1 [Source:HGNC Symbol;Acc:2605]                              |
| ENSG00000234616 | -1.03820 | 3.28341 | 12.11818 | 0.000499 | 0.034860 | JRK           | jerky homolog (mouse) [Source:HGNC Symbol;Acc:6199]                                                               |
| ENSG00000197124 | -1.07233 | 2.65758 | 12.01768 | 0.000527 | 0.035835 | ZNF682        | zinc finger protein 682 [Source:HGNC Symbol;Acc:28857]                                                            |
| ENSG00000100078 | -1.55672 | 0.91795 | 11.99306 | 0.000534 | 0.036008 | PLA2G3        | phospholipase A2, group III [Source:HGNC Symbol;Acc:17934]                                                        |
| ENSG00000099194 | -1.18796 | 8.85737 | 11.90836 | 0.000559 | 0.036913 | SCD           | stearoyl-CoA desaturase (delta-9-desaturase) [Source:HGNC Symbol;Acc:10571]                                       |
| ENSG00000274349 | -1.07794 | 2.50834 | 11.91038 | 0.000558 | 0.036913 | NA            | NA                                                                                                                |
| ENSG00000171291 | -1.02423 | 3.32195 | 11.90682 | 0.000559 | 0.036913 | ZNF439        | zinc finger protein 439 [Source:HGNC Symbol;Acc:20873]                                                            |
| ENSG00000137872 | -1.19177 | 5.71449 | 11.85924 | 0.000574 | 0.037397 | SEMA6D        | sema domain, transmembrane domain (TM), and cytoplasmic domain, (semaphorin) 6D [Source:HGNC Symbol;Acc:16770]    |
| ENSG00000137976 | -1.88449 | 1.88299 | 11.78792 | 0.000596 | 0.038537 | DNASE2B       | deoxyribonuclease II beta [Source:HGNC Symbol;Acc:28875]                                                          |
| ENSG00000276409 | -1.98823 | 1.35850 | 11.71362 | 0.000620 | 0.038833 | NA            | NA                                                                                                                |
| ENSG00000146166 | -1.93876 | 0.93318 | 11.74996 | 0.000608 | 0.038833 | LGSN          | lensin, lens protein with glutamine synthetase domain [Source:HGNC Symbol;Acc:21016]                              |
| ENSG00000111144 | -1.11123 | 8.16197 | 11.72359 | 0.000617 | 0.038833 | LTA4H         | leukotriene A4 hydrolase [Source:HGNC Symbol;Acc:6710]                                                            |
| ENSG00000115648 | -0.90705 | 6.99280 | 11.69131 | 0.000628 | 0.039172 | MLPH          | melanophilin [Source:HGNC Symbol;Acc:29643]                                                                       |
| ENSG00000204420 | -1.33403 | 2.10145 | 11.55626 | 0.000675 | 0.040399 | C6orf25       | chromosome 6 open reading frame 25 [Source:HGNC Symbol;Acc:13937]                                                 |
| ENSG00000083814 | -1.05999 | 2.14547 | 11.58014 | 0.000667 | 0.040399 | ZNF671        | zinc finger protein 671 [Source:HGNC Symbol;Acc:26279]                                                            |
| ENSG00000280399 | -1.04645 | 3.51487 | 11.52535 | 0.000687 | 0.040695 | NA            | NA                                                                                                                |
| ENSG00000130598 | -1.66960 | 1.67328 | 11.37485 | 0.000744 | 0.043472 | TNNI2         | troponin I type 2 (skeletal, fast) [Source:HGNC Symbol;Acc:11946]                                                 |
| ENSG00000242640 | -1.27400 | 2.09154 | 11.37487 | 0.000744 | 0.043472 | RP11-302F12.1 |                                                                                                                   |
| ENSG00000260361 | -1.41449 | 1.57306 | 11.36577 | 0.000748 | 0.043523 | CTD-2313J17.5 |                                                                                                                   |
| ENSG00000128268 | -1.03122 | 4.10459 | 11.25277 | 0.000795 | 0.044933 | MGAT3         | mannosyl (beta-1,4)-glycoprotein beta-1,4-N-acetylglucosaminyltransferase [Source:HGNC Symbol;Acc:7046]           |
| ENSG00000143971 | -0.87887 | 4.52574 | 11.24570 | 0.000798 | 0.044933 | ETAA1         | Ewing tumor-associated antigen 1 [Source:HGNC Symbol;Acc:24648]                                                   |
| ENSG00000184730 | -1.20820 | 4.80847 | 11.23012 | 0.000805 | 0.044989 | APOBR         | apolipoprotein B receptor [Source:HGNC Symbol;Acc:24087]                                                          |
| ENSG00000169905 | -0.64610 | 6.29022 | 11.20608 | 0.000815 | 0.045414 | TOR1AIP2      | torsin A interacting protein 2 [Source:HGNC Symbol;Acc:24055]                                                     |
| ENSG00000271971 | -1.34560 | 1.21604 | 11.19417 | 0.000821 | 0.045545 | CTD-2006H14.2 |                                                                                                                   |
| ENSG00000247373 | -1.51065 | 1.43984 | 11.18336 | 0.000825 | 0.045550 | RP11-486O12.2 |                                                                                                                   |
| ENSG00000152213 | -1.41694 | 2.39502 | 11.15503 | 0.000838 | 0.045572 | ARL11         | ADP-ribosylation factor-like 11 [Source:HGNC Symbol;Acc:24046]                                                    |
| ENSG00000108846 | -1.00965 | 4.82562 | 11.14213 | 0.000844 | 0.045572 | ABCC3         | ATP-binding cassette, sub-family C (CFTR/MRP), member 3 [Source:HGNC Symbol;Acc:54]                               |
| ENSG00000115419 | -0.67350 | 6.69722 | 11.14136 | 0.000844 | 0.045572 | GLS           | glutaminase [Source:HGNC Symbol;Acc:4331]                                                                         |
| ENSG00000152804 | -1.30047 | 3.72252 | 11.04738 | 0.000888 | 0.046623 | HEX           | hematopoietically expressed homeobox [Source:HGNC Symbol;Acc:4901]                                                |
| ENSG00000165186 | -1.25021 | 2.29810 | 11.06390 | 0.000880 | 0.046623 | PTCHD1        | patched domain containing 1 [Source:HGNC Symbol;Acc:26392]                                                        |
| ENSG00000257550 | -1.3123  |         |          |          |          |               |                                                                                                                   |



DE mRNA comb FDR 0.05 down

| Ensembl gene    | logFC    | logCPM  | LR       | PValue   | adj.p    | gene          | Description                                                                                   |
|-----------------|----------|---------|----------|----------|----------|---------------|-----------------------------------------------------------------------------------------------|
| ENSG00000164683 | -1.54699 | 4.37894 | 10.78562 | 0.001023 | 0.048224 | HEY1          | hes-related family bHLH transcription factor with YRPW motif 1 [Source:HGNC Symbol;Acc:4880]  |
| ENSG00000280048 | -1.90525 | 0.28699 | 10.74691 | 0.001045 | 0.048622 | NA            | NA                                                                                            |
| ENSG00000130544 | -0.99904 | 3.42857 | 10.71347 | 0.001064 | 0.048850 | ZNF557        | zinc finger protein 557 [Source:HGNC Symbol;Acc:28632]                                        |
| ENSG00000150337 | -1.13465 | 3.54856 | 10.69821 | 0.001072 | 0.048968 | FCGR1A        | Fc fragment of IgG, high affinity la, receptor (CD64) [Source:HGNC Symbol;Acc:3613]           |
| ENSG00000256229 | -0.94205 | 2.66936 | 10.70280 | 0.001070 | 0.048968 | ZNF486        | zinc finger protein 486 [Source:HGNC Symbol;Acc:20807]                                        |
| ENSG00000273033 | -0.82338 | 4.25747 | 10.69044 | 0.001077 | 0.049032 | RP11-67L2.2   |                                                                                               |
| ENSG00000262222 | -1.38648 | 1.06365 | 10.66043 | 0.001095 | 0.049690 | RP11-876N24.4 |                                                                                               |
| ENSG00000174837 | -1.52189 | 2.74022 | 10.63087 | 0.001112 | 0.049913 | EMR1          | egf-like module containing, mucin-like, hormone receptor-like 1 [Source:HGNC Symbol;Acc:3336] |
